1 **Genome-wide Variants of Eurasian Facial Shape**  
2 **Differentiation and a prospective model of DNA based Face**  
3 **Prediction**

4

5 Lu Qiao<sup>1</sup>, Yajun Yang<sup>2,3</sup>, Pengcheng Fu<sup>4</sup>, Sile Hu<sup>1</sup>, Hang Zhou<sup>1</sup>, Shouneng Peng<sup>1</sup>,  
6 Jingze Tan<sup>2,3</sup>, Yan Lu<sup>1</sup>, Haiyi Lou<sup>1</sup>, Dongsheng Lu<sup>1</sup>, Sijie Wu<sup>1</sup>, Jing Guo<sup>1</sup>, Li Jin<sup>1,2,3,6</sup>,  
7 Yaqun Guan<sup>5</sup>, Sijia Wang<sup>1,6,\*</sup>, Shuhua Xu<sup>1,6,7,\*</sup>, Kun Tang<sup>1,\*</sup>

8

9 <sup>1</sup> Shanghai Institutes for Biological Sciences, University of Chinese Academy of  
10 Sciences, Chinese Academy of Science, Shanghai 200031, China.

11 <sup>2</sup>State Key Laboratory of Genetic Engineering and Ministry of Education Key  
12 Laboratory of Contemporary Anthropology, School of Life Sciences, Fudan  
13 University, Shanghai 200433, China.

14 <sup>3</sup>Fudan-Taizhou Institute of Health Sciences, 1 Yaocheng Road, Taizhou, Jiangsu  
15 225300, China.

16 <sup>4</sup>Department of neurology, the First People's Hospital of Chenzhou, Hunan, 423000,  
17 China.

18 <sup>5</sup>Department of Biochemistry and Molecular Biology, Preclinical Medicine College,  
19 Xinjiang Medical University, Urumqi 830011, China.

20 <sup>6</sup>Collaborative Innovation Center of Genetics and Development, Shanghai 200438,  
21 China.

22 <sup>7</sup>School of Life Science and Technology, ShanghaiTech University, Shanghai 200031,

1 China.

2 \*tangkun@picb.ac.cn (K.T.), xushua@picb.ac.cn (S.X.), wangsijia@picb.ac.cn (S.W.)

3

## 1 **Abstract**

2 It is a long standing question as to which genes define the characteristic facial features  
3 among different ethnic groups. In this study, we use Uyghurs, an ancient admixed  
4 population to query the genetic bases why Europeans and Han Chinese look different.  
5 Facial traits were analyzed based on high-dense 3D facial images; numerous  
6 biometric spaces were examined for divergent facial features between European and  
7 Han Chinese, ranging from inter-landmark distances to dense shape geometrics.  
8 Genome-wide association analyses were conducted on a discovery panel of Uyghurs.  
9 Six significant loci were identified four of which, rs1868752, rs118078182,  
10 rs60159418 at or near *UBASH3B*, *COL23A1*, *PCDH7* and rs17868256 were replicated  
11 in independent cohorts of Uyghurs or Southern Han Chinese. A prospective model  
12 was also developed to predict 3D faces based on top GWAS signals, and tested in  
13 hypothetic forensic scenarios.

14

## 15 **Introduction**

16 The human face plays a pivotal role in daily life. Communication, mutual  
17 identification, sexual attraction, etc... all strongly depends on face. It has been long  
18 noted that faces bear characteristic features that may surrogate one's ancestry, even in  
19 highly admixed populations <sup>1</sup>. Our recent investigation <sup>2</sup> also revealed strong  
20 morphological divergence on multiple facial features, including nose, brow ridges,  
21 cheeks and jaw, between Europeans and Han Chinese. It is therefore a fundamental  
22 and intriguing question to ask: Which genetic variants contribute to the substantial

1 morphological differences among continental populations?

2 Normal facial shape is known to be highly heritable<sup>3-5</sup>. However, until recently,  
3 very little was known about the genetic basis of common variation of facial  
4 morphology. In the last few years, several genome-wide association studies (GWAS)  
5 were carried out and multiple face shape associated loci were identified<sup>6-10</sup>. These  
6 studies all based their phenotyping on conventional scalar measurements involving  
7 limited number of landmarks. On the other hand, efforts have been paid to use dense  
8 3D face modeling (3dDFM), a novel high-dimensional data format, to fully represent  
9 the complex facial shape phenome<sup>2,11,12</sup>. Peng *et al.* first applied 3dDFM to identify  
10 the association between common mouth shape variation and a cleft-lip related genetic  
11 locus<sup>13</sup>. Claes *et al.* showed that numerous genes are associated with complex normal  
12 facial shape variation based on 3dDFM<sup>14</sup>, and proposed the potential of modeling the  
13 3D face based on genotype and its use in forensic practice<sup>14,15</sup>.

14 In this study, we aimed at identifying loci on a genome-wide scale that contribute  
15 to the divergent facial morphological features between Europeans and Han Chinese.  
16 In brief, GWAS were conducted on the polarized face phenotypes along the  
17 European-Han dimensions, and Uyghur was used as the study cohort to dissect the  
18 genotype-phenotype association. Uyghur is a minority group living in Xinjiang  
19 province in China, and was found to have arisen from ancient admixtures between  
20 East-Asian and European ancestries at a roughly equal ratio, followed by a long  
21 period of isolation<sup>16-18</sup>. Furthermore, Uyghur facial traits demonstrated a wide range  
22 of shape gradients between the characteristic Europeans and Han-Chinese faces<sup>2</sup>.

1 These properties made Uyghur an ideal group to study the genetic variants of  
2 divergent facial features across Eurasia. We performed GWAS in 694 Uyghurs using  
3 both landmark based and 3dDFM based phenotypes. Significant loci were replicated  
4 in an independent Uyghur sample and a Han Chinese cohort. Next, we carried out a  
5 prospective investigation on whether 3D faces could be predicted to certain degree by  
6 using the top associated single nucleotide polymorphisms (SNPs). A quantitative  
7 model was established to summarize the phenotypic effects of multiple loci and to  
8 simulate realistic 3D face models. The prediction model was further tested in  
9 hypothetical forensic scenarios to evaluate the potential enhancement of face  
10 identification based on DNA.

11

## 12 **Results**

13 The studied cohorts included two independent Uyghur panels (694 and 171  
14 individuals) from Xinjiang China, used as GWAS discovery panel (UIG-D) and  
15 replication panel (UIG-R) respectively. UIG-D and UIG-R were genotyped on  
16 Illumina Omni ZhongHua-8 and Affymetrix Genome-Wide Human SNP Array 6.0  
17 respectively. In order to obtain a common set of SNPs, the array data of UIG-D and  
18 UIG-R was imputed to obtain the whole genome sequencing (WGS) SNPs (see  
19 Materials and Methods). The SNPs genotyped on arrays are referred to as genotyped  
20 SNPs hereafter, in order to distinguish from the imputed SNPs. In addition, 1504 Han  
21 Chinese were sampled from Chenzhou China (HAN-CZ) as a replication panel for  
22 candidate SNPs (Table 1). Furthermore, a Han Chinese cohort from Taizhou China

1 (HAN-TZ, 929) and 86 Shanghai residents of European ancestry (EUR) were used as  
2 the phenotype reference groups (Table 1). The participants were peer group with  
3 20.02 +/- 2.16 (SD) years old. We collected their three-dimensional facial images and  
4 mapped them to a common 32,251 points' spatial dense mesh automatically<sup>12</sup>. Based  
5 on these, we first defined the candidate phenotypes of study. Briefly, the face images  
6 were jointly analyzed among EUR, UIG-D and HAN-TZ, and complex face data was  
7 decomposed to various phenotype measurements (see Materials and Methods). A  
8 candidate phenotype is chosen and termed an ancestry-divergent phenotype if there  
9 exists a strong phenotypic divergence between EUR and HAN-TZ, and UIG-D covers  
10 a wide range in-between (Fig. 1). Three types of ancestry-divergent phenotypes were  
11 defined. First, ten inter-landmark distances were selected (see Materials and Methods;  
12 Fig. S1A and Tables S1-S3). The other two types of phenotypes were based on  
13 decomposing the high dimensional 3dDFM data. Briefly, we first extracted six facial  
14 features, namely, the brow ridge, eyes, side faces, cheeks, nose and mouth, grossly  
15 based on the reported high among-population differentiation<sup>2</sup> (Fig. S1B). The  
16 extracted 3dDFM data was decomposed by either partial least square (PLS) or  
17 principle component (PC) analysis<sup>2</sup>, and the PLS model and PC model that defined  
18 the strongest segregation between EUR and HAN-TZ were selected as  
19 ancestry-divergent phenotypes, hereafter termed as sPLS and sPC respectively in each  
20 feature (see Materials and Methods; Fig. 2, Figures S2-S4 and Table S4). In total, six  
21 sPLS and sPC phenotypes were defined, corresponding to the six facial features.

22

## 1 **Genome-wide association studies of Eurasian facial shape**

2 We carried out sex-stratified and sex-mixed GWAS in UIG-D on 8,100,752  
3 genome-wide SNPs for the 22 ancestry-divergent phenotypes (see Materials and  
4 Methods; Table S5). In general, the lower  $P$  value inflation assessed by  
5 Quantile-Quantile (Q-Q) plot<sup>19</sup> analyses revealed little subpopulation stratification  
6 (Fig. S5). Six regions revealed signals of genome-wide significance<sup>20</sup> at the level of  
7  $P < 5 \times 10^{-8}$  (Fig. 2 and Table 2). We focus the discussion on the genotyped SNPs of  
8 the highest signal (index SNP) within each region, as their genotypes were more  
9 reliable. These include rs1868752 (at 11q24.1) associated with distance between  
10 external canthus and internal canthus (ExtCan-IntCan) in mixed genders,  
11 rs118078182 (on *COL23A1* at 5q35.3) associated with distance of Nasion  
12 point-Pronasale-Subnasale (Nsn-Prn-Sbn) in mixed genders, rs60159418 (on *PCDH7*  
13 at 4p15.1) associated with mouth sPC in males, rs17868256 (at 2p16.3) associated  
14 with cheek sPLS in females, rs3920540 (near *BMP2* at 20p12.3) associated with nasal  
15 sPLS in females, and rs61672954 (at 3p12.2) associated with the sPLS of side-faces  
16 in mixed genders. In order to control for potential confounding effects from varying  
17 ancestry makeup with mean contribution of ~ 50:50 (CEU:CHB, 0.05 s.d.) (Fig. S6),  
18 we inferred the ancestry proportions for each UIG-D individual. The six signals  
19 remained after accounting for the inferred ancestry in the association model (Table  
20 S6). The genome-wide p-values of the index SNPs should be taken as nominal, as in  
21 total 66 GWA analyses (22 traits in females, males and gender mixed) were carried  
22 out in total. Noticing that the ancestry-divergent phenotypes were highly correlated

1 among each other (Table S7), we applied Benjamini-Hochberg procedure for FDR <sup>21</sup>  
2 to address the multiple testing problem (see Materials and Methods). Four index SNPs  
3 remained significant genome-widely, including rs1868752, rs118078182, rs60159418  
4 and rs17868256 (Table 2, Table S8).

5 Ideally, the effects of shape related loci should be directly visualized on facial  
6 images. We modeled the effects of index SNPs using heat plots as well as extrapolated  
7 faces <sup>22</sup> (Fig. 3, Movies S1-S6). As can be seen in Figure 3A (Movie S1), the  
8 extrapolated face towards the effect of rs1868752T had narrower eyes (smaller  
9 ExtCan-IntCan distance) compared to the G allele, resulting in a substantial  
10 displacement on the X axis; G also seemed to be associated with elevated nose ridge.  
11 SNP rs118078182 showed an obvious impact on the nasal shape along the Y and Z  
12 axes. Compared to rs118078182A, rs118078182G seemed to make the nose longer  
13 and more protrusive (taller) from the face, consistent with the association with  
14 Nsn-Prn-Sbn distance (Fig. 3B, Movie S2). For rs60159418 in males (Fig. 3C, Movie  
15 S3), the main shape changed the mouth along the Y axis, followed by Z axis. Allele G  
16 seemed to make the whole mouth area recessed from the face plane; in comparison,  
17 the mouth-chin curve bended convexly from the facial plane in the extrapolated face  
18 of the A allele. rs60159418 also seemed to influence other facial features: for G allele,  
19 nose and chin looked relatively protrusive outwards, and eye brow ridges seemed to  
20 elevate. The SNP rs17868256 mainly affected the shape of cheeks (Fig. 3D, Movie  
21 S4), with G allele associated to laterally expanded cheeks, making the face look wider  
22 on the X axis. On the Y axis, rs17868256G also seemed to lift the cheek protrusion



1 upwards. For SNP rs3920540 in females (Fig. 3E, Movie S5), G allele was mainly  
2 associated with repressed nasal bridge and nasal tip along Z axis compared to T allele;  
3 G allele also seemed to link to more protrusive chin on the extrapolated face. The  
4 most notable effect of rs61672954 occurred around the jaw lines (Fig. 3F, Movie S6),  
5 with the A allele associated with stronger jawlines and therefore comparatively wider  
6 lower face than the extrapolated face of G allele.

7

### 8 **Replication studies and meta-analysis**

9 We replicated the six GWAS significant loci in an independent Uyghur cohort (UIG-R)  
10 and a Han Chinese cohort (HAN-CZ) (Table S9). The former has the same ethnic  
11 background with UIG-D<sup>16-18</sup> and the latter represents a pool of Han Chinese ancestry  
12 from southern China<sup>23</sup>. Face is highly complex, and the effects of genetic variants on  
13 face can be subtle and strongly depend on other factors such as ethnicity and gender  
14<sup>14,24,25</sup>. On the other hand, face related genetic loci may be pleiotropic, e.g., that a  
15 single variant may influence facial morphology on different parts and/or in different  
16 ways<sup>6,7,14,26,27</sup>. In view of this, we defined two types of association replications: the  
17 narrow-sense and broad-sense replications. Narrow-sense replication stood for the  
18 association signals replicated on exactly the same ancestry-divergent phenotypic  
19 measurement; whereas broad-sense replication required the index loci to show  
20 evidences of association with any shape changes in the same facial feature. In this  
21 study, both the narrow- and broad-sense replications were conditioned in the same  
22 gender group as for the discovery panel. As a result (Table 2), the association of

1 rs1868752 with ExtCan-IntCan exhibited narrow-sense replication ( $P=0.04$ ) in a  
2 dominant model in HAN-CZ. The SNP rs118078182 showed narrow-sense  
3 replications in an additive ( $P=0.004$ ) and a dominant model ( $P=0.003$ ) in UIG-R, in a  
4 dominant model ( $P=0.02$ ) in HAN-CZ, as well as in the additive model of UIG-R and  
5 HAN-CZ combined ( $P=0.02$ ). For rs60159418, the narrow-sense replication was  
6 tested by projecting the UIG-R and HAN-CZ 3dDFM data to the sPC of mouth where  
7 the GWAS signal was found in UIG-D males, and revealed marginal significance in  
8 HAN-CZ ( $P=0.09$ ) and combined group of UIG-R and HAN-CZ ( $P=0.05$ ). For  
9 rs17868256, the narrow-sense association in females was successfully replicated for  
10 cheek sPLS in UIG-R for both the additive model ( $P=0.04$ ) and a dominant model  
11 ( $P=0.02$ ). The other two index loci didn't show evidences of narrow-sense replication.

12 To systematically test the broad-sense replication, we carried out pair-wise shape  
13 distance (PSD) permutation as previous proposed<sup>13</sup> and PLS-based permutation for  
14 the 3dDFM data (see Materials and Methods). Table 3 summarized the results of  
15 broad-sense replications. In general, these tests confirmed the results of narrow-sense  
16 replications, showing that rs1868752, rs118078182, rs60159418 and rs17868256  
17 affect the overall shapes of the corresponding features. Furthermore, rs3920540, the  
18 nose related locus that failed to replicate in the narrow-sense test, turned out to  
19 significantly affect the overall nasal shape in PSD permutation test ( $P=0.01$ ) and  
20 PLS-based permutation test ( $P=0.03$ ) in HAN-CZ.

21 Visualization in UIG-R and HAN-CZ revealed highly consistent effects of the  
22 ancestry-divergent variants as in UIG-D<sup>22</sup> (Fig. 4), despite the distinct ethnicity of

1 HAN-CZ. Intriguingly in UIG-R, the effects of some index SNPs were strongly  
2 persistent not only within the facial features of GWAS signals, but also across the  
3 whole face. In HAN-CZ, similar influence on the whole face could also be observed.  
4 In particular, rs1868752T was involved in recessive eye-sockets and repressed nasal  
5 bridge in all three cohorts (Fig. 4A); rs118078182A seemed to make the whole face  
6 more flat and round in addition to its effects on nasal shape (Fig. 4B); Other than  
7 affecting the mouth shape (Fig. 4C), rs60159418G was also associated with stronger  
8 brow ridges and more protrusive chin among the three groups. These indicated that  
9 the identified association signals were authentic, and the candidate variants were in  
10 general highly pleiotropic.

11

## 12 **Replication of reported variants of facial variation**

13 We explored whether the candidate SNPs that previously reported to affect normal  
14 facial variation<sup>6-8</sup> also showed signals of association in our combined Uyghur cohort  
15 (UIG-D + UIG-R). Replications were carried out either on the original or related  
16 measurements for 12 SNPs (Table S10). Notably, numerous candidate loci were  
17 re-validated to varying degrees. Briefly, rs4648379 in *PRDM16*, rs7559271 in *PAX3*,  
18 rs2045323 in *DCHS2*, rs17640804 in *GLI3*, rs805722 in *COL17A1* and rs927833 in  
19 *PAX1* reported to affect nasal phenotypes in different ethnic groups<sup>6-8</sup>, were found to  
20 also modulate normal nasal shape in Uyghurs (Table S10). The SNPs rs3827760 in  
21 *EDAR* and rs6184 in *GHR* that were previously linked to mandibular shape variation  
22 turned out to be significant or marginally significant in our study<sup>8,27,28</sup> (Table S10).

1 Interestingly, the SNP rs642961 in *IRF6*, previously found to be associated with the  
2 mouth shape in Han Chinese females<sup>13,29</sup>, also showed marginal significance ( $P=0.05$ )  
3 in Uyghur females but not in males or mixed gender group, implying that the  
4 dependence of the genetic effect of rs642961 on gender was shared among different  
5 populations.

6

### 7 **A prospective 3D face prediction model based on genome-wide SNPs**

8 Hypothetically, if a quantitative trait is highly heritable, a proper model featuring  
9 major genetic factors should lead to true prediction<sup>30-32</sup>. For the purpose of face  
10 prediction within Uyghurs, GWA analyses should be carried out on common facial  
11 variations in all dimensions. Therefore, in addition to the 22 ancestry-divergent  
12 phenotypes, we further included GWA analyses on a comprehensive list of phenotypes  
13 of various perspectives within Uyghurs, including 26 inter-landmark, 18 PC and 12  
14 PLS phenotypes (see Supplementary Note). The total number of GWA analyses used  
15 for face prediction was exceptionally large (234) and a conventional cutoff for GWAS  
16 is impractical. We therefore assumed that SNPs reaching a nominal genome-wide  
17 threshold of  $P$  value  $< 1 \times 10^{-6}$  were enriched for facial shape related loci. All SNPs  
18 that satisfy the threshold were combined into a panel of 277 top SNPs (Table S11).  
19 Based on these top SNPs, a simple quantitative model was constructed using UIG-D  
20 data. Briefly, for each SNP, a residual face was obtained for each genotype by  
21 subtracting the genotype average face by the global average. To compose a predicted  
22 face (PF), the 277 residual faces were scaled by a global “effect coefficient”  $\alpha$  (see

1 Supplementary Note; Fig. S7), and then added to the base face (the average face  
2 stratified by gender) according to the specific genotypes of the individual of interest.  
3 Details of the model construction can be referred to the supplementary materials  
4 (Supplementary Note).

5 The prediction model was applied to Uyghur individuals from the independent  
6 replication panel (UIG-R). The PF and actual faces can be visualized but quantitative  
7 evaluation of their similarity is difficult with human observers (Fig. 5A, Movie S7).  
8 To formally access the resemblance between predicted and actual faces we  
9 constructed a robust shape similarity statistic: the shape space angle (SSA). SSA was  
10 defined as the angle between two shapes in the 3dDFM data space <sup>15,33</sup> (see  
11 Supplementary Note). SSA would achieve 0 if the two shapes were the same. A SSA  
12 of 90 degree stood for statistical independence, whereas a SSA greater than 90  
13 indicated that two faces deviated from the mean face in reverse directions. Tests of  
14 shape similarity were carried out in UIG-R stratified by gender to see whether the  
15 differences from the actual face to their corresponding PF was indeed smaller than to  
16 random faces. We used two types of random faces. The first was the random-genotype  
17 predicted faces (RGF; see Supplementary Note), adopted from a previous study <sup>15</sup>.  
18 Briefly, a RGF was generated in the same way as the PF, except that the genotype set  
19 used for prediction was replaced by a random genotype set permuted from the known  
20 frequencies of genotypes in the combined UIG cohort. The other was the  
21 random-actual faces (RAF) set, which was obtained by randomly sampling the UIG-R  
22 actual faces. We constructed two types of tests, one is to compare the SSA

1 distributions (inter-distribution test) between the random predicted faces and the PF  
2 faces; the other test the average similarity score (single-score test) between the PF and  
3 actual faces, against the null distributions based on multiple iterations using RGF<sup>15</sup> or  
4 RAF as prediction (see Supplementary Note). Both tests generated similar results  
5 (Figs. 5B and 5C), that the females of UIG-R did not show marked differences  
6 between the PF and random predictions (the inter-distribution test  $P=0.87$  in RGF and  
7  $P=0.73$  in RAF; the single-statistic test  $P=0.35$  in RGF and  $P=0.34$  in RAF). However,  
8 in males, the true prediction significantly outperformed the random predictions in all  
9 the tests (the inter-distribution test  $P=0.01$  in RGF and  $P=0.04$  in RAF; the  
10 single-statistic test  $P=0.02$  in RGF and  $P=0.02$  in RAF).

11 Intriguingly, face prediction based on genotypes would promote the suspect  
12 identification in pragmatic forensic scenarios. We simulated toy forensic scenarios  
13 where a single true suspect should be picked up from a group of 8 candidates (Fig.  
14 S8). We supposed that the 3D facial data and genotypes could be obtained from each  
15 candidate to allow mathematical comparison between the actual and PF. Interestingly,  
16 there was a significant increase in accuracy (+6.3%, empirical  $P=0.025$ ) in males  
17 compared to the simulated neutral distribution ( $12.4\% \pm 0.03SD$ ) assuming no  
18 prediction power at all (see Materials and Methods). In females, the prediction did not  
19 substantially enhance the accuracy (+3.3%, empirical  $P=0.076$ ) (Fig. 5D).

20

## 21 **Discussion**

22 To our knowledge, this was the first GWAS aimed at identify genetic loci associated

1 with normal facial variations based on complex 3dDFM data that revealed multiple  
2 genetic determinants underlying the European-East Asian facial trait divergence. The  
3 genome-wide significant loci were located on independent regions and respectively  
4 associated with shape of eyes, nose, mouth, cheeks and side faces. We successfully  
5 replicated four loci, rs1868752, rs118078182, rs60159418 and rs17868256 in  
6 independent cohorts on the same phenotype measurements. In addition, the  
7 association signal of rs3920540 was replicated in broad-sense.

8 SNP rs1868752 is not located in any gene region. The nearest protein coding gene  
9 is the ubiquitin associated and SH3 domain containing B (*UBASH3B*) about 140kb  
10 distal, which regulates epidermal growth factor receptor (*EGFR*) and platelet-derived  
11 growth factor receptor (*PDGFRA*). The longer eye length, consistent to European  
12 traits is associated with the derived allele rs1868752G. However, rs1868752G has a  
13 low global frequency (< 10%), and the population frequency in CEU is even lower  
14 (~1.5%) than in CHB (~4%), suggesting that this SNP does not play a major role in  
15 the Eurasian face differentiation. The SNP rs118078182 has the most consistent  
16 association signals across different sample panels and test models. This SNP is an  
17 intronic variant in collagen type 23 alpha 1 (*COL23A1*). *COL23A1* codes a  
18 non-abundant trans-membrane collagen, primarily found in head, skin, tendon, and  
19 kidney<sup>34</sup>. A possible role of spatial/temporal regulation in facial morphogenesis was  
20 noted for *COL23A1*<sup>35</sup>. Interestingly the G allele of rs118078182, associated with the  
21 European trait of longer and taller nose is almost fixed (99.5%) in CEU compared to  
22 the sequentially lower frequencies of ~90% in Uyghur and ~79% in CHB, suggesting

1 that rs118078182 plays a major role in the nasal shape divergence across Eurasia. The  
2 other nasal shape related SNP, rs3920540 is approximately 300kb away from the  
3 nearest protein coding gene *BMP2*, which is a member of the bone morphogenetic  
4 proteins involved in the development of bone and cartilage<sup>36-39</sup>. The T allele of  
5 rs3920540 pertaining to the European trait of taller nose does not seem to differ in  
6 frequency (0.86, 0.85 and 0.88 in CEU, UIG and CHB respectively) among the three  
7 populations, suggesting that this SNP mainly contribute to the within-group variation  
8 of nasal shape. The mouth shape related SNP rs60159418 is situated in an intron of  
9 the protocadherin 7 gene (*PCDH7*). *PCDH7* codes an integral membrane protein  
10 functioning in cell-cell recognition and adhesion. Previous studies showed that  
11 *PCDH7* played a key role in osteoclastogenesis<sup>40</sup>, and its homologue gene is a pivotal  
12 regulator in the head formation of the mouse embryo<sup>41</sup>. Consistently, the derived G  
13 allele that co-occurs with the concaved European mouth shape is almost fixed in CEU  
14 (0.96, Table 2), much lower (0.64) in UIG, whereas in CHB the ancestral A allele is  
15 the major allele (allele frequency 0.63). These suggest that rs60159418 contributes to  
16 the mouth shape differentiation across Eurasia. Notably, rs60159418 is among the  
17 most divergent SNPs between CEU and CHB ( $F_{st_{CEU-CHB}} = 0.4$ ), suggesting an  
18 involvement of local adaptations in this region. For the SNP rs17868256, the derived  
19 G allele is associated with the Han Chinese trait of higher zygomatic arches and more  
20 cambered outwards and backwards zygomatics, and the corresponding allele  
21 frequency is also the highest in CHB (0.52), followed by UIG (0.36) and CEU (0.25),  
22 as indicates that rs17868256 is involved in the phenotypic divergence in cheeks



1 between Europeans and Han Chinese. The SNP rs61672954, associated with side face  
2 shapes was not replicated statistically in HAN-CZ (sample sizes for AA, GA  
3 genotypes were too small to analysis in UIG-R), but had the same facial variation  
4 patterns among different genotypes as in the discovery UIG-D cohort (Fig. S9). So we  
5 cannot remove their potential effect on facial shape.

6 One evident limitation of this study is the relative small sample sizes for the UIG  
7 cohorts. A power analysis revealed that tests would be constrained and the association  
8 signals would not be highly significant (e.g. all GWAS  $P$  values  $> 1 \times 10^{-11}$ ). And yet,  
9 even given the limited sample sizes we were still able to detect 6 genome-wide  
10 association signals, among which five were replicated to various degrees. This may be  
11 attributed mainly to the specific study designs: first, as the Uyghur was examined on  
12 the phenotypic dimensions where the ancestral groups EUR and HAN differ the most,  
13 the search was thus focused on genetic variants of large effect size, rendering higher  
14 test power for a given sample size. Second, the 3dDFM data densely annotates each  
15 face by over 30,000 vertices, resulting in virtually face phenome data. Based on this,  
16 the association signals were scanned both phenome-widely and genome-widely, as  
17 would greatly enhance the power of detecting the phenotype-genotype associations.

18 Several trends are notable involving the genetic architecture of facial morphology.  
19 First, no GWAS loci of “major effects” were identified that account for a large portion  
20 of phenotypic variance in spite of the strong overall divergence, e.g., in nasal shape  
21 across Eurasia<sup>2</sup>. This is in contrast to the case of skin pigmentation whose major  
22 genetic factors explain substantial phenotypic variance<sup>42-44</sup>. This suggests that the

1 human face should be best described by a typical polygenic model of complex trait,  
2 characterized by a large number of variants of small effects. Second, most facial shape  
3 related variants seem to be pleiotropic. All the candidate loci in our study seem to be  
4 associated to the complex shape changes of whole face, not limited to the features of  
5 GWAS signals, in similar trends across the three sample cohorts, implying that such  
6 dispersive facial changes were induced by genetic variants rather than stochasticity  
7 (Figs. 3 and 4). At the individual gene level, *PCDH7* was also known for its versatile  
8 functions, related to not only mouth shape but also musical aptitude<sup>45</sup>, waist-to-hip  
9 ratio<sup>46</sup> and many diseases<sup>40,41,47-49</sup>. Another SNP rs3827760 in *EDAR*, replicated in  
10 this study was also known for its broad effects in hair morphology, incisor shape and  
11 sweat gland density<sup>26,27,50,51</sup>. Third, the genetic effects of face related loci seem to be  
12 shared among different ethnicities<sup>52-54</sup>. This is evident given that the association  
13 signals and facial patterns are in general consistent between Uyghur and Han Chinese  
14 (Tables 2 and 3, Fig. 4). It may be thus hypothesized that the stereotypic faces of  
15 ethnicities are merely result of population stratification of the face-related allele  
16 frequencies. For example, a European nose is “big” probably due to the  
17 co-segregation of a higher proportion of “big” nose alleles compared to that of an  
18 average Han Chinese. Indeed, four (rs118078182, rs60159418, rs61672954 and  
19 rs17868256) out of the six candidate SNPs in this study have moderate ( $F_{st_{CEU-CHB}} >$   
20 0.08) to strong (for rs60159418,  $F_{st_{CEU-CHB}} = 0.5$ , top 0.3% genome-widely)  
21 population differentiation, each of which seems to contribute a gradient to the  
22 continuous transition from European to Han Chinese faces.

1           In the end, we showed that an additive genetic model of whole face shape, based  
2   on a set of SNPs of top association signals, would lead to measurable predictive  
3   power. We showed that for independent individuals (UIG-R), the prediction model  
4   can also construct realistic 3D faces significantly closer to the actual face than random  
5   expectation (Figs. 5B and 5C); test in the hypothetical forensic scenarios revealed a  
6   moderate yet significant enhancement of the identification rate in males (Fig. 5D).  
7   The better performance in male face prediction than in females may attribute to the  
8   sexual dimorphism<sup>55,56</sup> and greater variation in male faces. If we measure the sample  
9   dispersion of individuals from the corresponding average faces by PSD, the dispersion  
10   was substantially larger in males (mean dispersion = 1.80) than in females (mean  
11   dispersion = 1.73, Kolmogorov-Smirnov test  $P = 0.0025$ ). As on average the genetic  
12   distance from an individual to the average genome is equal for male and female  
13   (assuming only autosomal variants are concerned), the larger dispersion suggests on  
14   average bigger allelic effects in males than in females, thus better statistical power  
15   and prediction model in males. There may be redundant markers within the 277 top  
16   SNPs, as the SNP sets filtered for strong LD gave very similar performance (see  
17   Supplementary Note; Table S12 for prediction, Table S13 for forensic).  
18   Fundamentally, it can be argued that this prediction model is not really additive, as the  
19   best-fitting effect coefficient  $\alpha$  is far lower than 1 (Fig. S7), even for the SNP set (209)  
20   well controlled for the physical LD (Fig. S7C). This may implicate epistatic  
21   interactions between the causal SNPs, or is probably mainly due to a proportion of  
22   false-positive signals in the top SNPs set. Further studies specifically designed for

1 examination of the genetic architecture is needed to address this question.  
2 Furthermore, we noticed that increasing the number of top SNPs in the prediction  
3 model (either for  $P$  value  $< 1 \times 10^{-7}$  or  $1 \times 10^{-5}$  SNPs) could not improve the  
4 predictive power. Such saturation analysis suggests a finite number of loci affecting  
5 the normal facial shape. After all, this prediction model is highly simplified and  
6 explorative. Much work is needed to improve its performance to be formally tested in  
7 real forensic scenarios.

8

## 9 **Materials and Methods**

### 10 **Study cohorts**

11 EUR was a resident cohort living in Shanghai with self-reported European ancestry  
12 between 16 and 42 years old. The HAN-TZ participants were self-reported Han  
13 Chinese samples collected from Taizhou, Jiangsu province. College students of  
14 self-reported Han ethnicity from Xiangnan University in Chenzhou, Hunan province  
15 were collected as HAN-CZ. The UIG-D and UIG-R were composed of college  
16 students of self-reported Uyghurs collected from Xinjiang Medical University in  
17 Urumchi, Xinjiang province. The self-reported ancestry information was requested for  
18 the last three generations, and individuals with mixed ancestry or missing information  
19 were excluded from further analyses. For EUR, a participant was used only if his/her  
20 ancestries of the last three generations were all from EU countries (as for 2015) plus  
21 Switzerland, Norway and Iceland. Individuals with obvious health problems or any  
22 history of facial surgery were ruled out. All sample collection in this study was carried

1 out in accordance with the ethical standards of the ethics committee of the Shanghai  
2 Institutes for Biological Sciences (SIBS) and the Declaration of Helsinki, and has  
3 been specifically surveyed and approved by SIBS. All methods were carried out in  
4 accordance with the corresponding guidelines and regulations. A written statement of  
5 informed consent was obtained from every participant, with his/her authorizing  
6 signature. The participants, whose transformed facial images were used in this study  
7 as necessary illustrations of our methodology, have been shown the manuscript and  
8 corresponding figures. Aside from the informed consent for data sampling, a consent  
9 form stating the identifying information in an online open-access publication was  
10 shown and explained to each participant and their authorizing signature was obtained  
11 as well.

12

### 13 **High-density 3D facial images alignment**

14 The 3dMDface® system ([www.3dmd.com/3dMDface](http://www.3dmd.com/3dMDface)) was used to collect  
15 high-resolution 3D facial images. We first established dense anatomical  
16 correspondence across dense surfaces of 3D facial images automatically as described  
17 previously<sup>12</sup>. Briefly, 15 salient facial landmarks were annotated automatically based  
18 on the principal component analysis (PCA) projection of texture and shape  
19 information. A reference face was selected for high image quality and smooth surface,  
20 and its mesh was resampled to achieve an even density of one vertex in each 1mm ×  
21 1mm grid. There were 32,251 vertices in total for the reference mesh. Afterwards, the  
22 reference face was warped to register to each objective face to ensure the complete

1 overlapping of the 15 landmarks via a thin-plate spline (TPS) transformation. The  
2 vertices on the reference face then found their closest projections on the sample face  
3 to define the samples' new vertices, resulting in a point-to-point correspondence. At  
4 last, the Generalized Procrustes analysis (GPA) was used to align the sample grids  
5 into a common coordinate system. As a result, we obtained a set of 32,251 3D points  
6 to represent each participant's face. Samples with defective images were removed  
7 from the study.

8

### 9 **Genotyping, quality control and imputation**

10 Genomic DNA extracted from blood samples of UIG-D and UIG-R were genotyped  
11 on corresponding genotyping arrays. Quality control were performed using PLINK  
12 v1.07<sup>57</sup>. Furthermore, 92 individuals from UIG-D were whole-genome sequenced at  
13 high-coverage (30×). We didn't consider SNPs on mitochondria. SNPs with MAF  
14 <0.01, call rate <90%, or rejection in the Hardy-Weinberg Equilibrium test with  $P < 1$   
15  $\times 10^{-6}$  were omitted from the study. Genomic ancestry was detected using  
16 EIGENSTRAT 5.0.2<sup>58,59</sup> with CHB and CEU from 1000 Genomes Project<sup>60</sup> (1KG  
17 phase1 release v2) to remove samples who were not Uyghurs ancestry. Specifically,  
18 principal component analysis using 17,552 autosomal SNPs pruned from UIG-D  
19 panel based on call rate (>90%), MAF (>0.01), and LD (pairwise  $r^2 < 0.1$ ) was used to  
20 assess population structure. Samples with genotype missing rate >0.1 were removed.  
21 Samples were further examined by pairwise IBD estimation and inbreeding  
22 coefficients to remove individuals of close genetic relationships. Specifically, we used

1 17,552 independent SNPs to estimate the pairwise IBD to find pairs of individuals  
2 who genetically look too similar to each other and set inbreeding coefficients  $>0.2$  or  
3  $<-0.2$  as in inbreeding. Individuals with aberrant gender information checked using X  
4 chromosome data were discarded. Finally, samples with defective 3D images were  
5 removed from the study. Detailed results of QC were given in Table S5. In the end, a  
6 total of 847,046 SNPs were used in 694 UIG-D and 758,453 SNPs were used in the  
7 171 UIG-R. Genomic DNA of HAN-CZ was extracted from saliva according to a  
8 modified Phenol-chloroform protocol <sup>61</sup>. Targeted genotyping for the index SNPs  
9 were carried out by SNaPshot multiplex system on an ABI3130xl genetic analyzer by  
10 Genesky Biotech, Shanghai, China. The results of SNaPshot genotyping quality  
11 control were shown in Table S14.

12 In order to merge the data between UIG-D and UIG-R, which used different  
13 genotyping platform, we carried out imputation within UIG-D and UIG-R separately,  
14 using whole genome sequencing data as reference. Specifically, the chip data were  
15 pre-phased using SHAPEIT v2.r790 <sup>62</sup>, and then imputed for probabilistic genotypes  
16 by Impute2 <sup>63</sup> taking 1,092 individuals from 1000 Genomes project phase 1 and 92  
17 high-coverage (30×) whole-genome sequencing data of Uyghurs (unpublished data)  
18 as reference. The genotyped SNPs with a large difference between the info and  
19 concordance values ( $\text{info\_type0} - \text{concord\_type0} > 0.1$ ) or a low concordance value  
20 ( $< 0.7$ ) were excluded for further analysis. Additionally, SNPs were removed with low  
21 imputation quality score ( $< 0.4$ ), followed by converting the genotype probabilities to  
22 corresponding allele pair when it was over the threshold  $> 0.9$  using GTOOL software

1 <sup>62</sup>. SNPs with MAF <0.01 or a call rate <90% were omitted.

2

### 3 **Extraction of ancestry-divergent phenotypes**

4 Three types of ancestry-divergent phenotypes were defined. The first type, the  
5 landmark based ancestry-divergent phenotypes were defined based on the 15  
6 landmarks (Fig. S1A). Briefly, the whole face were divided into five parts (Table S1).  
7 Thirty six distances or angles were then defined as traditional anthropometric traits,  
8 many of which measure highly correlated facial features (Table S2). We chose 10  
9 traits (Table S3) as the ancestry-divergent phenotypes, which surrogate the 36 traits  
10 and showed higher segregation (lower Students' test *P* value, Table S3) between EUR  
11 and HAN-TZ.

12 The second type is the PCA based ancestry-divergent phenotypes (sPC). Six  
13 facial features were extracted from the 3dDFM face data (Fig. 1B), which were then  
14 decomposed using PCA separately. The top PCs that together explained 98% total  
15 variance were examined for phenotypic segregation between EUR and HAN-TZ using  
16 Students' Test (Fig. S2 and Table S4). The PC that defined the most significant  
17 segregation was taken as the ancestry-divergent phenotype, named as sPC.

18 PLS based ancestry-divergent phenotypes (sPLS) were defined as follows: In the  
19 PLS equation "response ~ predictor", we labeled the individuals from EUR as 1 and  
20 HAN-TZ as 2 in response. The predictor term featured  $3 \times n$  matrix of the 3dDFM  
21 data, where *n* stood for the number of vertices in the corresponding facial feature. The  
22 PLS regression were first carried out only with EUR and HAN-TZ data. An optimal



1 PLS model is a regression model composed of the first  $k$  top ranking PLS  
2 component(s), where  $k$  renders the best prediction from predictor to response.  
3 Leave-one-out (LOO) was used to cross-validate PLS models, with increasing number  
4 of top components, and the root mean squared error of prediction (RMSEP) was used  
5 to evaluate the overall prediction. There exist two cross-validation (CV) estimates  
6 based on RMSEP (Fig. S3 and Table S4): ‘CV’ was the ordinary CV estimate, and  
7 ‘adjCV’ was a bias-corrected CV estimate. A PLS regression model achieves the  
8 maximal discrimination between EUR and HAN-TZ (Table S4) when the RMSEP  
9 showed turning point on adjCV curve (Fig. S3), and the corresponding  $k$  was used. An  
10 optimal PLS model was found in each facial feature and termed sPLS model.

11

## 12 **Statistical analyses and replications**

13 Genome-wide association tests were carried out using PLINK v1.07<sup>57</sup> and a linear  
14 regression model with additive SNP effects was used. For multiple testing correction,  
15 we performed the Benjamini-Hochberg procedure for FDR<sup>21</sup> to the combined results  
16 of the 66 autosomal GWA analyses. A FDR level of 0.05 was used to determine  
17 whether a test remained significant after multiple-testing correction.

18 For narrow-sense replication, the 3dDFM data from UIG-R and HAN-CZ were  
19 either projected to the sPC spaces or input to the sPLS models defined in UIG-D, to  
20 obtain the corresponding phenotype scores in narrow-sense replication. An additive  
21 linear regression was used to test the association between index SNPs and the  
22 corresponding narrow-sense phenotype. This test required a minimum of 10

1 individuals that carry at least one minor allele.

2 Index SNPs were also tested for broad-sense replication. For PLS-based  
3 permutation, genotypes (0, 1, 2 in additive model and 0, 1 in dominant model) of each  
4 SNP were taken as predictor. Principle components (PCs) that together explained 99%  
5 of the total variance of each facial feature were adopted as response. A scheme of  
6 Leave One Out (LOO) was used in which  $N-1$  individuals were used as training and  
7 the left-out was used as test. This was repeated until every individual was used as a  
8 test sample. The training set was used to build a PLS regression model whose optimal  
9 number of components was determined by RMSEP under cross-validation, as  
10 described before. Based on this model, a predicted genotype was given to the test  
11 sample. By such analogy, every sample obtained a predicted genotype. Afterwards,  
12 the correlation between actual genotype and predicted genotype can be calculated.  
13 Next, we performed a permutation procedure to control the supervised effect of PLS  
14 <sup>64-67</sup>. Briefly, the genotypes were reshuffled randomly among the samples for 1,000  
15 times, followed by the same procedure as above to calculate correlations between the  
16 actual and predicted genotypes. The null distribution of correlations can be thus  
17 established based on the permutation sets. The corrected PLS-based permutation  $P$   
18 value was generated by ranking the empirical raw correlation against the null  
19 distribution.

20 For the pair-wise shape distance (PSD) permutation among genotypes <sup>13</sup>, we  
21 calculated the Euclidean distances between the mean shapes of any two genotype  
22 groups. The mean shape can be denoted as a vector,

1 
$$s = [x_1, y_1, z_1, \dots, x_n, y_n, z_n] \quad (1)$$

2 where  $x_i, y_i, z_i$  was the X, Y, Z coordinate values of the  $i$ th points,  $n$  was the  
3 number of points.

4 For each two genotypes mean shape  $s$  and  $s'$ , the PSD was defined as

5 
$$PSD = \frac{\sum_{i=1}^n d_i^2}{3n} \quad (2)$$

6 where  $d_i^2 = (x_i - x'_i)^2 + (y_i - y'_i)^2 + (z_i - z'_i)^2$ .

7 We also randomly permuted the genotypes among the samples and then  
8 calculated the PSD between the pseudo-genotype groups. The PSD scores resulted  
9 from permutation formed the null distribution. The one-side  $P$  value was calculated by  
10 the proportion of permuted PSD smaller than or equal to the true PSD.

11

## 12 **Data availability**

13 All of the phenotypic measurements tested for association and 277 markers genotypes  
14 used for prediction are available through the Figshare, an online digital repository  
15 (<https://figshare.com>) with DOI: 10.6084/m9.figshare.4284770  
16 (<https://dx.doi.org/10.6084/m9.figshare.4284770>).

17

## 18 **References**

- 19 1 Klimentidis, Y. C. & Shriver, M. D. Estimating genetic ancestry proportions from faces. *PLoS*  
20 *One* **4**, e4460, doi:10.1371/journal.pone.0004460 (2009).  
21 2 Guo, J. *et al.* Variation and signatures of selection on the human face. *J Hum Evol* **75**, 143-152,  
22 doi:10.1016/j.jhevol.2014.08.001 (2014).  
23 3 Weinberg, S. M., Parsons, T. E., Marazita, M. L. & Maher, B. S. Heritability of Face Shape in  
24 Twins: A Preliminary Study using 3D Stereophotogrammetry and Geometric Morphometrics.  
25 *Dent* **3000** **1**, doi:10.5195/d3000.2013.14 (2013).  
26 4 Johannsdottir, B., Thorarinnsson, F., Thordarson, A. & Magnusson, T. E. Heritability of

- 1           craniofacial characteristics between parents and offspring estimated from lateral  
2           cephalograms. *American journal of orthodontics and dentofacial orthopedics : official*  
3           *publication of the American Association of Orthodontists, its constituent societies, and the*  
4           *American Board of Orthodontics* **127**, 200-207; quiz 260-201,  
5           doi:10.1016/j.ajodo.2004.07.033 (2005).
- 6   5       Martinez-Abadias, N. *et al.* Heritability of human cranial dimensions: comparing the  
7           evolvability of different cranial regions. *J Anat* **214**, 19-35,  
8           doi:10.1111/j.1469-7580.2008.01015.x (2009).
- 9   6       Liu, F. *et al.* A genome-wide association study identifies five loci influencing facial morphology  
10          in Europeans. *PLoS genetics* **8**, e1002932, doi:10.1371/journal.pgen.1002932 (2012).
- 11   7       Paternoster, L. *et al.* Genome-wide association study of three-dimensional facial morphology  
12          identifies a variant in PAX3 associated with nasion position. *American journal of human*  
13          *genetics* **90**, 478-485, doi:10.1016/j.ajhg.2011.12.021 (2012).
- 14   8       Adhikari, K. *et al.* A genome-wide association scan implicates DCHS2, RUNX2, GLI3, PAX1 and  
15          EDAR in human facial variation. *Nat Commun* **7**, 11616, doi:10.1038/ncomms11616 (2016).
- 16   9       Shaffer, J. R. *et al.* Genome-Wide Association Study Reveals Multiple Loci Influencing Normal  
17          Human Facial Morphology. *PLoS genetics* **12**, e1006149, doi:10.1371/journal.pgen.1006149  
18          (2016).
- 19   10       Cole, J. B. *et al.* Genomewide Association Study of African Children Identifies Association of  
20          SCHIP1 and PDE8A with Facial Size and Shape. *PLoS genetics* **12**, e1006174,  
21          doi:10.1371/journal.pgen.1006174 (2016).
- 22   11       TJ, H., BF, B., P, H. & HW, P. Estimating average growth trajectories in shape-space using kernel  
23          smoothing. *IEEE Transactions on Medical Imaging* **22**, 6 (2003).
- 24   12       Guo, J., Mei, X. & Tang, K. Automatic landmark annotation and dense correspondence  
25          registration for 3D human facial images. *BMC bioinformatics* **14**, 232,  
26          doi:10.1186/1471-2105-14-232 (2013).
- 27   13       Peng, S. *et al.* Detecting genetic association of common human facial morphological variation  
28          using high density 3D image registration. *PLoS computational biology* **9**, e1003375,  
29          doi:10.1371/journal.pcbi.1003375 (2013).
- 30   14       Claes, P. *et al.* Modeling 3D Facial Shape from DNA. *PLoS genetics* **10**, doi:10.1371/ (2014).
- 31   15       Claes, P., Hill, H. & Shriver, M. D. Toward DNA-based facial composites: preliminary results  
32          and validation. *Forensic science international. Genetics* **13**, 208-216,  
33          doi:10.1016/j.fsigen.2014.08.008 (2014).
- 34   16       Xu, S. & Jin, L. A genome-wide analysis of admixture in Uyghurs and a high-density admixture  
35          map for disease-gene discovery. *American journal of human genetics* **83**, 322-336,  
36          doi:10.1016/j.ajhg.2008.08.001 (2008).
- 37   17       Xu, S., Huang, W., Qian, J. & Jin, L. Analysis of genomic admixture in Uyghur and its  
38          implication in mapping strategy. *American journal of human genetics* **82**, 883-894,  
39          doi:10.1016/j.ajhg.2008.01.017 (2008).
- 40   18       Xu, S., Jin, W. & Jin, L. Haplotype-sharing analysis showing Uyghurs are unlikely genetic  
41          donors. *Molecular biology and evolution* **26**, 2197-2206, doi:10.1093/molbev/msp130 (2009).
- 42   19       Turner, S. D. qqman: an R package for visualizing GWAS results using Q-Q and manhattan  
43          plots. *bioRxiv*, doi:10.1101/005165 (2014).
- 44   20       Pruim, R. J. *et al.* LocusZoom: regional visualization of genome-wide association scan results.

- 1 *Bioinformatics* **26**, 2336-2337, doi:10.1093/bioinformatics/btq419 (2010).
- 2 21 Benjamini, Y. & Hochberg, Y. Controlling the False Discovery Rate: A Practical and Powerful  
3 Approach to Multiple Testing. *Journal of the Royal Statistical Society* **57**, 289-300 (1995).
- 4 22 Hu, S. *et al.* Signatures of personality on dense 3D facial images. *BioRxiv*, doi:10.1101/055590  
5 (2016).
- 6 23 Xu, S. *et al.* Genomic dissection of population substructure of Han Chinese and its implication  
7 in association studies. *American journal of human genetics* **85**, 762-774,  
8 doi:10.1016/j.ajhg.2009.10.015 (2009).
- 9 24 Talbert, L., Kau, C. H., Christou, T., Vlachos, C. & Souccar, N. A 3D analysis of Caucasian and  
10 African American facial morphologies in a US population. *J Orthod* **41**, 19-29,  
11 doi:10.1179/1465313313Y.0000000077 (2014).
- 12 25 Hopman, S. M., Merks, J. H., Suttie, M., Hennekam, R. C. & Hammond, P. Face shape differs in  
13 phylogenetically related populations. *European journal of human genetics : EJHG* **22**,  
14 1268-1271, doi:10.1038/ejhg.2013.289 (2014).
- 15 26 Kamberov, Y. G. *et al.* Modeling recent human evolution in mice by expression of a selected  
16 EDAR variant. *Cell* **152**, 691-702, doi:10.1016/j.cell.2013.01.016 (2013).
- 17 27 Peng, Q. *et al.* EDARV370A associated facial characteristics in Uyghur population revealing  
18 further pleiotropic effects. *Hum Genet* **135**, 99-108, doi:10.1007/s00439-015-1618-6 (2016).
- 19 28 Zhou, J. *et al.* The growth hormone receptor gene is associated with mandibular height in a  
20 Chinese population. *J Dent Res* **84**, doi:1052-6 (2005).
- 21 29 Rahimov, F. *et al.* Disruption of an AP-2alpha binding site in an IRF6 enhancer is associated  
22 with cleft lip. *Nat Genet* **40**, 1341-1347, doi:10.1038/ng.242 (2008).
- 23 30 Yang, J. *et al.* Common SNPs explain a large proportion of the heritability for human height.  
24 *Nat Genet* **42**, 565-569, doi:10.1038/ng.608 (2010).
- 25 31 Yang, J. *et al.* Genome partitioning of genetic variation for complex traits using common SNPs.  
26 *Nat Genet* **43**, 519-525, doi:10.1038/ng.823 (2011).
- 27 32 Wood, A. R. *et al.* Defining the role of common variation in the genomic and biological  
28 architecture of adult human height. *Nat Genet* **46**, 1173-1186, doi:10.1038/ng.3097 (2014).
- 29 33 Smeets, D., Claes, P., Vandermeulen, D. & Clement, J. G. Objective 3D face recognition:  
30 Evolution, approaches and challenges. *Forensic science international* **201**, 125-132,  
31 doi:10.1016/j.forsciint.2010.03.023 (2010).
- 32 34 Koch, M. *et al.* Expression of type XXIII collagen mRNA and protein. *The Journal of biological*  
33 *chemistry* **281**, 21546-21557, doi:10.1074/jbc.M604131200 (2006).
- 34 35 Weiguo Feng *et al.* Spatial and Temporal Analysis of Gene Expression during Growth and  
35 Fusion of the Mouse Facial Prominences. *PLoS One* **4**,  
36 doi:10.1371/journal.pone.0008066.t001 (2009).
- 37 36 D, C., M, Z. & GR, M. Bone morphogenetic proteins. *Growth Factors* **22**, 8,  
38 doi:10.1080/08977190412331279890 (2004).
- 39 37 PJ, M., F, D. & E, H. Regulation of human cranial osteoblast phenotype by FGF-2, FGFR-2 and  
40 BMP-2 signaling. *Histol. Histopathol* **17**, 8 (2002).
- 41 38 MR, U. Bone: formation by autoinduction. *Science* **150**, 6, doi:10.1126/science.150.3698.893  
42 (1965).
- 43 39 Geiger, M. Collagen sponges for bone regeneration with rhBMP-2. *Advanced Drug Delivery*  
44 *Reviews* **55**, 1613-1629, doi:10.1016/j.addr.2003.08.010 (2003).

- 1 40 Nakamura, H. *et al.* Global epigenomic analysis indicates protocadherin-7 activates  
2 osteoclastogenesis by promoting cell-cell fusion. *Biochemical and biophysical research  
3 communications* **455**, 305-311, doi:10.1016/j.bbrc.2014.11.009 (2014).
- 4 41 Fossat, N. *et al.* Context-specific function of the LIM homeobox 1 transcription factor in head  
5 formation of the mouse embryo. *Development* **142**, 2069-2079, doi:10.1242/dev.120907  
6 (2015).
- 7 42 Relethford, J. H. Apportionment of global human genetic diversity based on craniometrics  
8 and skin color. *American Journal of Physical Anthropology* **118**, doi:10.1002/ajpa.10079  
9 (2002).
- 10 43 JH, R. Global patterns of isolation by distance based on genetic and morphological data. *Hum  
11 Biol* **76**, 14 (2004).
- 12 44 Myles, S., Somel, M., Tang, K., Kelso, J. & Stoneking, M. Identifying genes underlying skin  
13 pigmentation differences among human populations. *Hum Genet* **120**, 613-621,  
14 doi:10.1007/s00439-006-0256-4 (2007).
- 15 45 Oikkonen, J. *et al.* A genome-wide linkage and association study of musical aptitude identifies  
16 loci containing genes related to inner ear development and neurocognitive functions.  
17 *Molecular Psychiatry* **20**, 7, doi:10.1038/mp.2014.8 (2015).
- 18 46 Surakka, I. *et al.* A genome-wide screen for interactions reveals a new locus on 4p15  
19 modifying the effect of waist-to-hip ratio on total cholesterol. *PLoS genetics* **7**, e1002333,  
20 doi:10.1371/journal.pgen.1002333 (2011).
- 21 47 Scannell Bryan, M. *et al.* Genome-wide association studies and heritability estimates of body  
22 mass index related phenotypes in Bangladeshi adults. *PLoS One* **9**, e105062,  
23 doi:10.1371/journal.pone.0105062 (2014).
- 24 48 Lemaitre, R. N. *et al.* Genetic loci associated with circulating levels of very long-chain  
25 saturated fatty acids. *Journal of lipid research* **56**, 176-184, doi:10.1194/jlr.M052456 (2015).
- 26 49 Comuzzie, A. G. *et al.* Novel genetic loci identified for the pathophysiology of childhood  
27 obesity in the Hispanic population. *PLoS One* **7**, e51954, doi:10.1371/journal.pone.0051954  
28 (2012).
- 29 50 Tan, J. *et al.* The adaptive variant EDARV370A is associated with straight hair in East Asians.  
30 *Hum Genet* **132**, 1187-1191, doi:10.1007/s00439-013-1324-1 (2013).
- 31 51 Adhikari, K. *et al.* A genome-wide association study identifies multiple loci for variation in  
32 human ear morphology. *Nat Commun* **6**, 7500, doi:10.1038/ncomms8500 (2015).
- 33 52 Bhatia, G. *et al.* Genome-wide scan of 29,141 African Americans finds no evidence of  
34 directional selection since admixture. *American journal of human genetics* **95**, 437-444,  
35 doi:10.1016/j.ajhg.2014.08.011 (2014).
- 36 53 Baynam, G. *et al.* The facial evolution: looking backward and moving forward. *Hum Mutat* **34**,  
37 14-22, doi:10.1002/humu.22219 (2013).
- 38 54 Sheehan, M. J. & Nachman, M. W. Morphological and population genomic evidence that  
39 human faces have evolved to signal individual identity. *Nat Commun* **5**, 4800,  
40 doi:10.1038/ncomms5800 (2014).
- 41 55 Kesterke, M. J. *et al.* Using the 3D Facial Norms Database to investigate craniofacial sexual  
42 dimorphism in healthy children, adolescents, and adults. *Biology of sex differences* **7**, 23,  
43 doi:10.1186/s13293-016-0076-8 (2016).
- 44 56 Bigoni, L., Velemínska, J. & Bruzek, J. Three-dimensional geometric morphometric analysis of

- 1           cranio-facial sexual dimorphism in a Central European sample of known sex. *Homo :  
2           internationale Zeitschrift für die vergleichende Forschung am Menschen* **61**, 16-32,  
3           doi:10.1016/j.jchb.2009.09.004 (2010).
- 4   57       Purcell, S. *et al.* PLINK: a tool set for whole-genome association and population-based linkage  
5           analyses. *American journal of human genetics* **81**, 559-575, doi:10.1086/519795 (2007).
- 6   58       Price, A. L. *et al.* Principal components analysis corrects for stratification in genome-wide  
7           association studies. *Nat Genet* **38**, 904-909, doi:10.1038/ng1847 (2006).
- 8   59       Patterson, N., Price, A. L. & Reich, D. Population structure and eigenanalysis. *PLoS genetics* **2**,  
9           e190, doi:10.1371/journal.pgen.0020190 (2006).
- 10 60       Genomes Project, C. *et al.* An integrated map of genetic variation from 1,092 human  
11           genomes. *Nature* **491**, 56-65, doi:10.1038/nature11632 (2012).
- 12 61       Hoff-Olsen, P. *et al.* Extraction of DNA from decomposed human tissue: An evaluation of five  
13           extraction methods for short tandem repeat typing. *Forensic science international* **105**, 12  
14           (1999).
- 15 62       Delaneau, O., Marchini, J., Genomes Project, C. & Genomes Project, C. Integrating sequence  
16           and array data to create an improved 1000 Genomes Project haplotype reference panel. *Nat  
17           Commun* **5**, 3934, doi:10.1038/ncomms4934 (2014).
- 18 63       Bryan N. Howie, Peter Donnelly & Marchini, J. A Flexible and Accurate Genotype Imputation  
19           Method for the Next Generation of Genome-Wide Association Studies. *PLoS genetics* **5**,  
20           doi:10.1371/journal.pgen.1000529.g001 (2009).
- 21 64       Indahl, U. A twist to partial least squares regression. *Journal of Chemometrics* **19**, 32-44,  
22           doi:10.1002/cem.904 (2005).
- 23 65       Liland, K. H. & Indahl, U. G. Powered partial least squares discriminant analysis. *Journal of  
24           Chemometrics* **23**, 7-18, doi:10.1002/cem.1186 (2009).
- 25 66       Indahl, U. G., Liland, K. H. & Naes, T. Canonical partial least squares-a unified PLS approach to  
26           classification and regression problems. *Journal of Chemometrics* **23**, 495-504,  
27           doi:10.1002/cem.1243 (2009).
- 28 67       Krishnan, A., Williams, L. J., McIntosh, A. R. & Abdi, H. Partial Least Squares (PLS) methods for  
29           neuroimaging: a tutorial and review. *Neuroimage* **56**, 455-475,  
30           doi:10.1016/j.neuroimage.2010.07.034 (2011).

31

## 32 **Acknowledgements**

33   We are grateful to all the volunteers taking part in this study. We thank Chen Liu,  
34   Nianhao Cheng for the assistance in sample collection; thank Wei Qian for PLS-based  
35   Methods discussion; thank Bertram Müller-Myhsok, Benno Pütz for non-linear  
36   methods discussion; thank David Allen Hughes Jr. for manuscript polishing and  
37   comments.

1

## 2 **Author Contributions**

3 Conceived and designed the study: K.T. Performed the study, summarized results and  
4 wrote the manuscript: L.Q., K.T. Advise the study and modified the manuscript: L.Q.,  
5 S.W., S.X., K.T. Contributed reagents/material/software: Y.Y., P.F., S.H., H.Z., J.T.,  
6 Y.L., H.L., D.L., S.W., J.G., S.P., L.J., Y.G., S.W., S.X. All authors read and  
7 approved the final manuscript.

8

## 9 **Additional Information**

### 10 **Competing Interests**

11 The authors declare that they have no competing interests.

12

## 13 **Figure Legend**

14 **Figure 1. Overall scheme of the study design.** In the top panel, the genetic structure  
15 of three Eurasian populations was analyzed by PCA based on the 1KG genome data of  
16 97 CHB (red), 85 CEU (blue) and the whole-genome sequencing of 694 UIG-D  
17 (green). Clear clustering can be seen based on the ethnic backgrounds. In particular,  
18 UIG-D individuals clearly lie in the half way between CEU and CHB along PC1, all  
19 consisted of a roughly equal ratio of CHB and CEU ancestries. Compared to the  
20 genetic composition, Uyghur individuals exhibit broad gradients of admixture in the  
21 facial phenotypes. The middle panel shows the average face models for EUR,  
22 European-like Uyghurs (EUR-like UIG-D), UIG-D, Han-like Uyghurs (HAN-like



1 UIG-D) and HAN-TZ from left to right. EUR-like UIG-D and HAN-like UIG-D were  
2 obtained by averaging over 20 UIG-D individuals visually accessed to resemble  
3 Europeans or Han Chinese. The bottom panel shows the distribution of sPLS in nose,  
4 revealing a distinct segregation between EUR and HAN-TZ and a wide spread of  
5 UIG-D stretching between EUR and HAN-TZ along this phenotype dimension. In this  
6 study, the highly divergent phenotypes as shown above were selected and tested for  
7 association loci genome-widely in UIG-D.

8 **Figure 2. Six genomic regions harboring SNPs of genome-wide significant**  
9 **associations with facial shape. (A) 11q24, (B) 5q35, (C) 4q15, (D) 2q16, (E) 20q12,**  
10 **(F) 3q12.** The LocusZoom plots show the association (left y-axis) with corresponding  
11 ancestry-divergent traits labelled on the top. Genotyped SNPs are denoted by circles  
12 and imputed SNPs are denoted by stars. The plots are given for the 500kb flanking  
13 region centered by the genotyped index loci indicated by purple circles. Color  
14 gradient of SNPs depict the linkage disequilibrium ( $r^2$ ) between each SNP and index  
15 SNP.

16 **Figure 3. Heat plots and extrapolated faces of six index SNPs affected on**  
17 **responding partial shape. (A) the association of rs1868752 with the distance**  
18 **between ExtCan and IntCan, (B) the association of rs118078182 with the distance of**  
19 **Nsn-Prn-Sbn, (C) the association of rs60159418 with the sPC of mouth in males, (D)**  
20 **the association of rs17868256 with the sPLS of cheeks in females, (E) the association**  
21 **of rs3920540 with nasal sPLS in females, (F) the association of rs61672954 with the**  
22 **sPLS of side faces. For each SNP, the first face shows the general effect on the**

1 corresponding feature as the displacement of landmarks or meshes. The mid-panel of  
2 four miniature faces gives the extrapolations towards the Han trend on the top, or the  
3 European trend on the bottom, with the associated allele labeled at the left side. The  
4 extrapolated faces were morphed by exemplifying the difference between the average  
5 faces of the opposite homozygotes if both are more than 10% frequent in UIG-D, or  
6 the major homozygote and the heterozygote if otherwise. The last three faces depict  
7 the signed displacement of the average faces of the fore-mentioned genotypes in X, Y  
8 and Z axes; obtained by subtracting the average face of European-trend from that of  
9 the Han-trend.

10 **Figure 4. Visualization in UIG-R and HAN-CZ revealed largely consistent effects**  
11 **of the ancestry-divergent variants as in UIG-D.** For the four index loci, (A)  
12 rs1868752, (B) rs118078182, (C) rs60159418 and (D) rs17868256, we compared the  
13 extrapolated faces in UIG-D, UIG-R and HAN-CZ from left to right. For each locus,  
14 the top faces in the trend of Han Chinese and the bottom ones are in European trend  
15 for the corresponding feature.

16 **Figure 5. Test of the prediction model in UIG-R.** (A) cases of visualization of  
17 actual face (left column), the PF (middle column) and the displacement between the  
18 pair in heat plot (right column). (B) Evaluation by inter-distance test. The comparison  
19 between true SSA distribution (in brown) and random SSA distribution in RGF (left  
20 column) or RAF (right column) was tested by Student's Test. (C) Evaluation by  
21 single-statistic test. The average SSA determined for the cohorts (in brown) were  
22 compared to the RGF (left column) and RAF (right column) distributions under null

1 hypothesis (in dodgerblue).  $P$  values are the probability of predicted statistic  
2 distributed on the relative random normal distribution calculated like normal one-side  
3  $P$  value. **(D)** Evaluation of the face prediction in a hypothetical forensic scenario. SSA  
4 as accuracy statistics are evaluated in UIG-R females (left column) and UIG-R males  
5 (right column). The true accuracy rate based on SSA, in brown, were determined by  
6 examining how many cases of successful identification were achieved in all combined  
7 iterations. The random accuracy rate was calculated after reshuffling the pairwise  
8 corresponds between actual face and PF. This process was repeated 1,000 times to  
9 obtain a distribution of random accuracy rates (in dodgerblue) under null hypothesis.  
10 The  $P$  values are the proportion of how many random accuracy rates were larger than  
11 true accuracy rate calculated as the empirical p-value.

12

## 13 **Tables**

14 **Table 1. Characteristics of study samples.**

| Location                  | Abb.   | For         | Ethnic      | Total N | Male N | Mean Age | Range (s.d.) |
|---------------------------|--------|-------------|-------------|---------|--------|----------|--------------|
| Urumchi, China            | UIG-D  | discovery   | Uyghur      | 694     | 270    | 20.09    | 17-25 (1.24) |
| Urumchi, China            | UIG-R  | replication | Uyghur      | 171     | 63     | 20.55    | 17-25 (1.42) |
| ChenZhou, China           | HAN-CZ | replication | Han Chinese | 1,504   | 424    | 19.69    | 17-32 (1.67) |
| TaiZhou, China            | HAN-TZ | discovery   | Han Chinese | 929     | 363    | 19.81    | 17-25 (0.95) |
| Europeans living Shanghai | EUR    | discovery   | European    | 86      | 57     | 27.59    | 16-42 (5.59) |

15 N, sample size

1 **Table 2. SNPs with GWAS signals and their narrow-sense replications**

| SNP         | Chr. | BP <sup>a</sup> | at or near Gene | MAF   | AA <sup>b</sup> | Ancestral Allele Frequency |                  |                  | Fst <sup>e</sup>   | Ratio <sup>f</sup> | gender group | Feature         | Discovery in additive model <sup>g</sup> |                     |                    | Replication in additive model |                    |         |                    |         |                    | Replication in dominant Model <sup>h</sup> |                    |                    |                    | Meta-analysis UIG-D+UIG-R in additive model |                        |        |      |   |
|-------------|------|-----------------|-----------------|-------|-----------------|----------------------------|------------------|------------------|--------------------|--------------------|--------------|-----------------|------------------------------------------|---------------------|--------------------|-------------------------------|--------------------|---------|--------------------|---------|--------------------|--------------------------------------------|--------------------|--------------------|--------------------|---------------------------------------------|------------------------|--------|------|---|
|             |      |                 |                 |       |                 | UIG <sup>c</sup>           | CHB <sup>d</sup> | CEU <sup>d</sup> |                    |                    |              |                 | UIG-D                                    |                     | UIG-R              |                               | HAN-CZ             |         | UIG-R+HAN-CZ       |         | aa+ab:bb           |                                            | aa:ab+bb           |                    | UIG-R              | HAN-CZ                                      | UIG-R                  | HAN-CZ | Beta | P |
|             |      |                 |                 |       |                 | Beta                       | P                | Adjusted P       |                    |                    |              |                 | Beta                                     | P                   | Beta               | P                             | Beta               | P       | Beta               | P       | P                  | P                                          | P                  | P                  |                    |                                             |                        |        |      |   |
| rs1868752   | 11   | 122391442       | UBASH3B         | 0.015 | T               | 0.99                       | 0.96             | 0.99             | $2 \times 10^{-4}$ | 0.95               | mixed        | ExtCan-IntCan   | 3.8                                      | $1 \times 10^{-10}$ | $3 \times 10^{-3}$ | -                             | -                  | 0.1     | $6 \times 10^{-1}$ | 0.1     | $6 \times 10^{-1}$ | -                                          | $4 \times 10^{-2}$ | $6 \times 10^{-1}$ | $8 \times 10^{-1}$ | 3.19                                        | $7.70 \times 10^{-9}$  |        |      |   |
| rs118078182 | 5    | 177922198       | COL23A1         | 0.10  | G               | 0.90                       | 0.79             | 0.99             | $2 \times 10^{-1}$ | 0.11               | mixed        | Nsn-Pm-Sbn      | -2.0                                     | $8 \times 10^{-9}$  | $5 \times 10^{-2}$ | -2.3                          | $4 \times 10^{-3}$ | -0.3    | $7 \times 10^{-2}$ | -0.4    | $2 \times 10^{-2}$ | $3 \times 10^{-1}$                         | $2 \times 10^{-2}$ | $3 \times 10^{-3}$ | $2 \times 10^{-1}$ | -2.07                                       | $2.64 \times 10^{-10}$ |        |      |   |
| rs60159418  | 4    | 31120752        | PCDH7           | 0.36  | A               | 0.36                       | 0.63             | 0.04             | $5 \times 10^{-1}$ | 0.003              | male         | Mouth sPC       | -19.8                                    | $9 \times 10^{-11}$ | $3 \times 10^{-3}$ | -5.7                          | $3 \times 10^{-1}$ | -4.4    | $9 \times 10^{-2}$ | -4.6    | $5 \times 10^{-2}$ | $7 \times 10^{-1}$                         | $1 \times 10^{-1}$ | $2 \times 10^{-1}$ | $2 \times 10^{-1}$ | -17                                         | $9.78 \times 10^{-10}$ |        |      |   |
| rs17868256  | 2    | 52032773        | -               | 0.36  | A               | 0.64                       | 0.48             | 0.75             | $1 \times 10^{-1}$ | 0.20               | female       | Cheek sPLS      | 0.05                                     | $7 \times 10^{-9}$  | $5 \times 10^{-2}$ | 0.05                          | $4 \times 10^{-2}$ | 0.003   | $5 \times 10^{-1}$ | 0.005   | $3 \times 10^{-1}$ | $2 \times 10^{-2}$                         | $2 \times 10^{-1}$ | $2 \times 10^{-1}$ | $9 \times 10^{-1}$ | 0.0522                                      | $1.07 \times 10^{-9}$  |        |      |   |
| rs3920540   | 20   | 7067738         | BMP2            | 0.15  | T               | 0.85                       | 0.88             | 0.86             | $2 \times 10^{-5}$ | 0.99               | female       | Nose sPLS       | 0.07                                     | $3 \times 10^{-8}$  | $1 \times 10^{-1}$ | 0.03                          | $4 \times 10^{-1}$ | -0.0007 | $9 \times 10^{-1}$ | -0.0008 | $9 \times 10^{-1}$ | -                                          | $4 \times 10^{-1}$ | $4 \times 10^{-1}$ | $6 \times 10^{-1}$ | 0.0652                                      | $4.69 \times 10^{-8}$  |        |      |   |
| rs61672954  | 3    | 82196528        | -               | 0.033 | G               | 0.97                       | 0.88             | 1                | $8 \times 10^{-2}$ | 0.25               | mixed        | side-faces sPLS | 0.1                                      | $2 \times 10^{-8}$  | $9 \times 10^{-2}$ | -                             | -                  | 0.002   | $8 \times 10^{-1}$ | 0.001   | $9 \times 10^{-1}$ | -                                          | $4 \times 10^{-1}$ | $7 \times 10^{-1}$ | 1                  | 0.101                                       | $2.61 \times 10^{-7}$  |        |      |   |

<sup>a</sup>NCBI build 37

<sup>b</sup>Ancestral allele

<sup>c</sup>in meta-UIGhurs (UIG-D + UIG-R)

<sup>d</sup>1KG phase 3 database

<sup>e</sup>Fst calculated between CHB and CEU in 1KG phase1 release 2 database

<sup>f</sup>in additive linear regression model, homozygote ancestral alleles as 0, heterozygote as 1, homozygote derived alleles as 2

<sup>h</sup>a allele stands for ancestral allele

"-" indicates null results in genes or null test in replications

2

3 **Table 3. Broad-sense replications of SNPs with GWAS signals**

| SNP         | PSD-based Permutation in HAN-CZ <sup>a</sup> |                    | PLS-based Permutation |                     |
|-------------|----------------------------------------------|--------------------|-----------------------|---------------------|
|             | between genotypes                            | HAN-CZ             | UIG-R                 | HAN-CZ              |
| rs1868752   | TG:TT                                        | $3 \times 10^{-2}$ | -                     | $7 \times 10^{-1}$  |
| rs118078182 | AA+GA:GG                                     | $3 \times 10^{-2}$ | $3 \times 10^{-3}$    | $3 \times 10^{-1}$  |
| rs60159418  | AA:GG                                        | $2 \times 10^{-1}$ | $2 \times 10^{-1}$    | $<1 \times 10^{-3}$ |
| rs17868256  | AA:GG                                        | $9 \times 10^{-3}$ | 1                     | $<1 \times 10^{-3}$ |
| rs3920540   | TG:TT                                        | $1 \times 10^{-2}$ | $7 \times 10^{-1}$    | $3 \times 10^{-2}$  |
| rs61672954  | AA:GG                                        | $4 \times 10^{-1}$ | -                     | $3 \times 10^{-1}$  |

<sup>a</sup>replication only in HAN-CZ as sample sizes in different genotype groups are too small in UIG-R

4

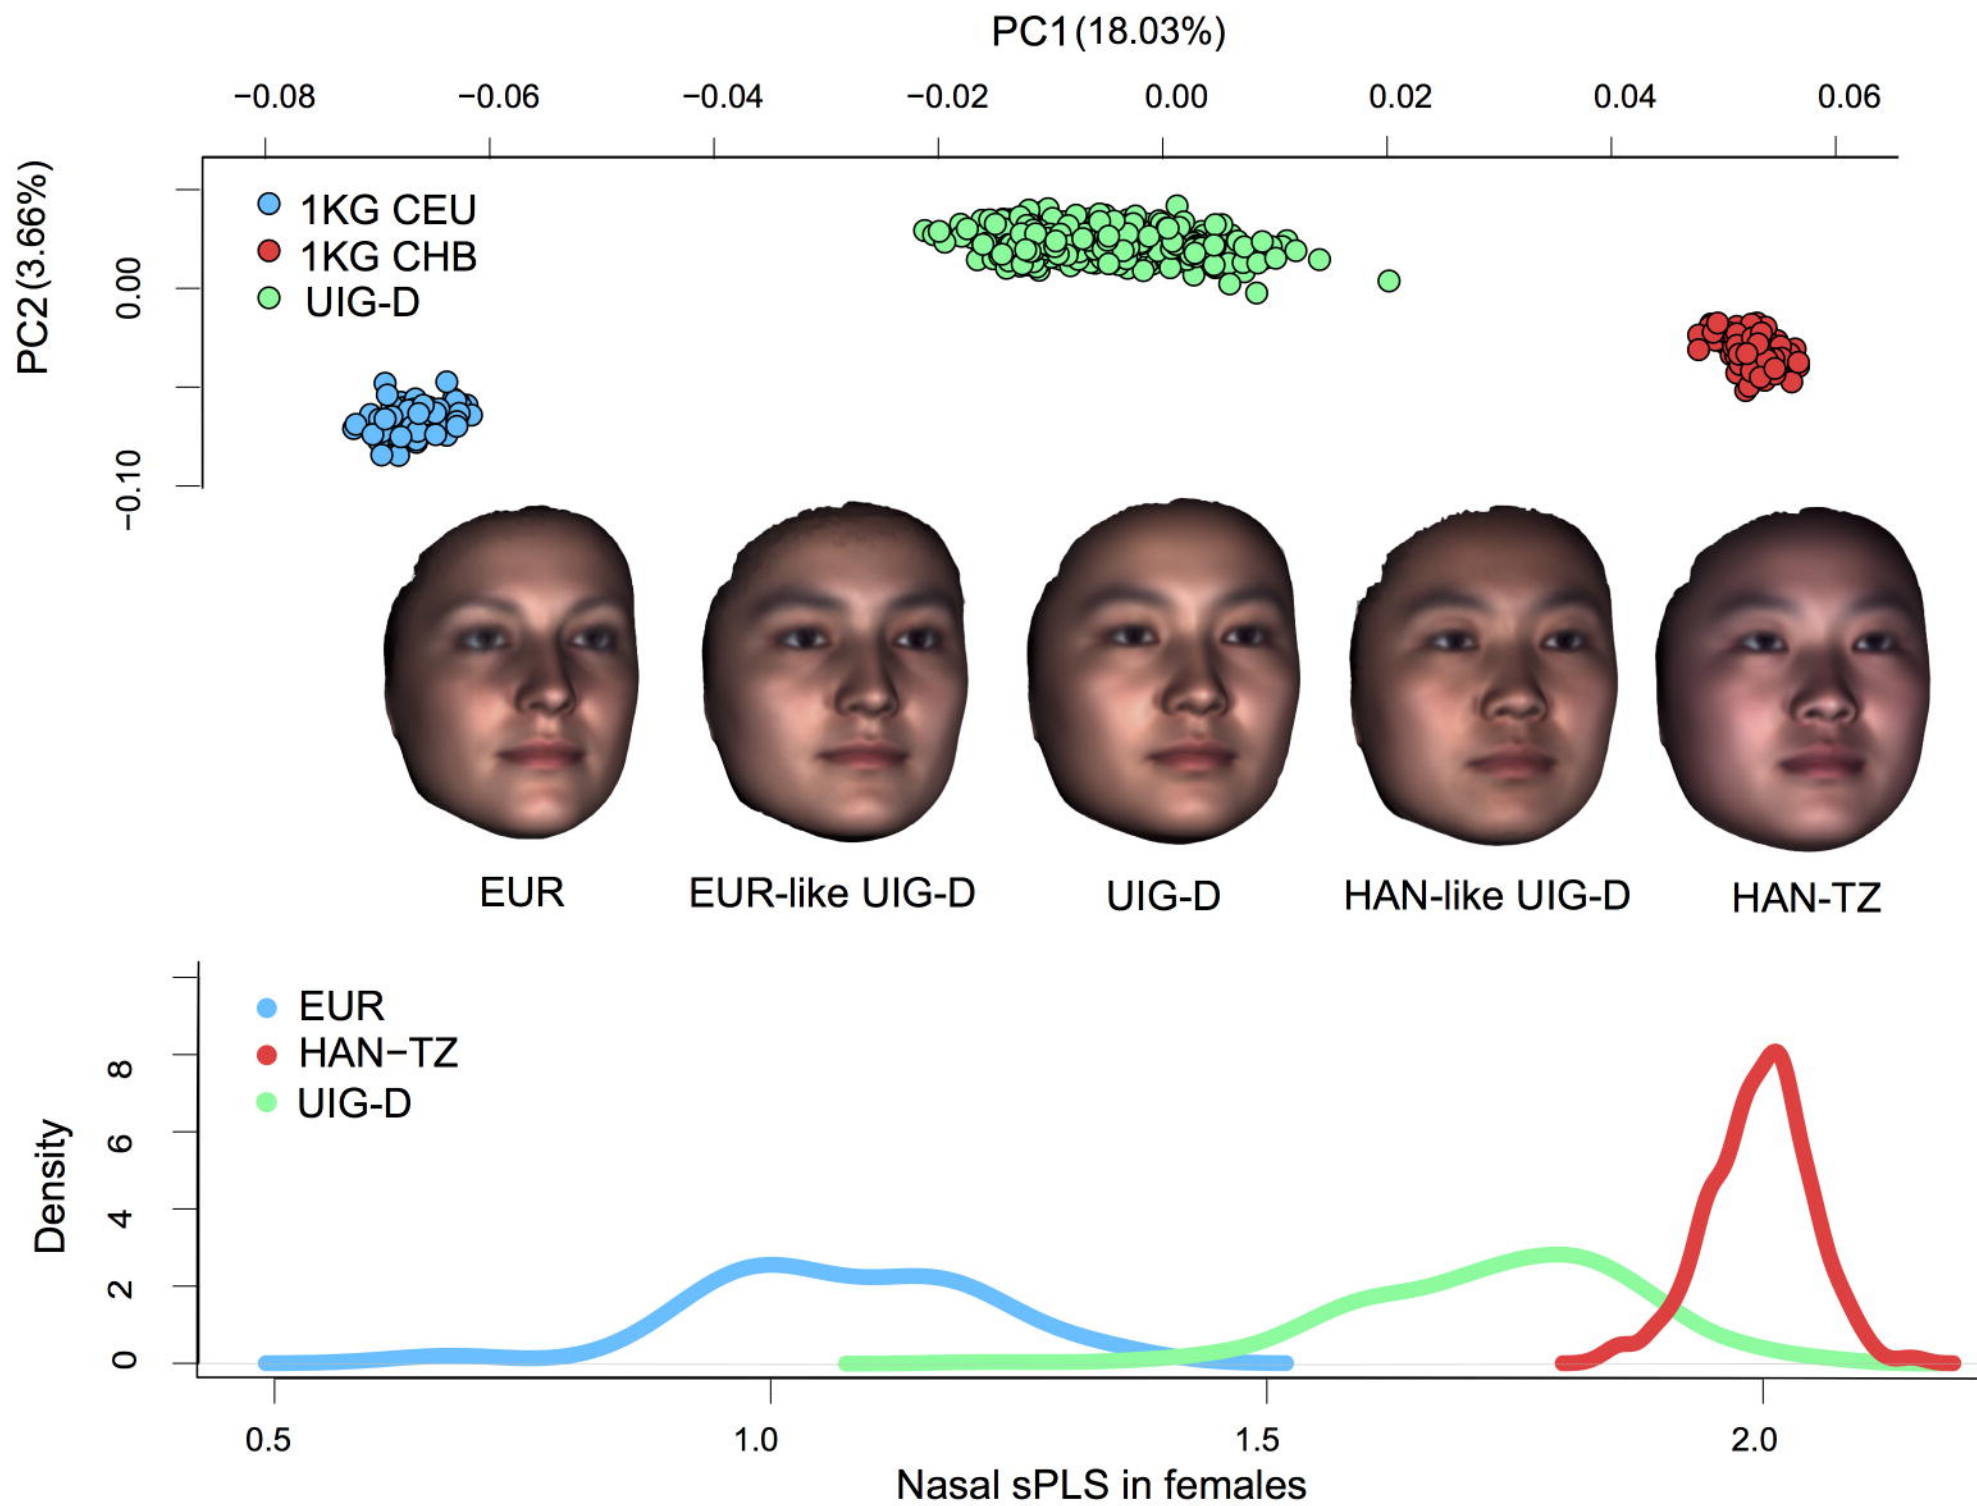

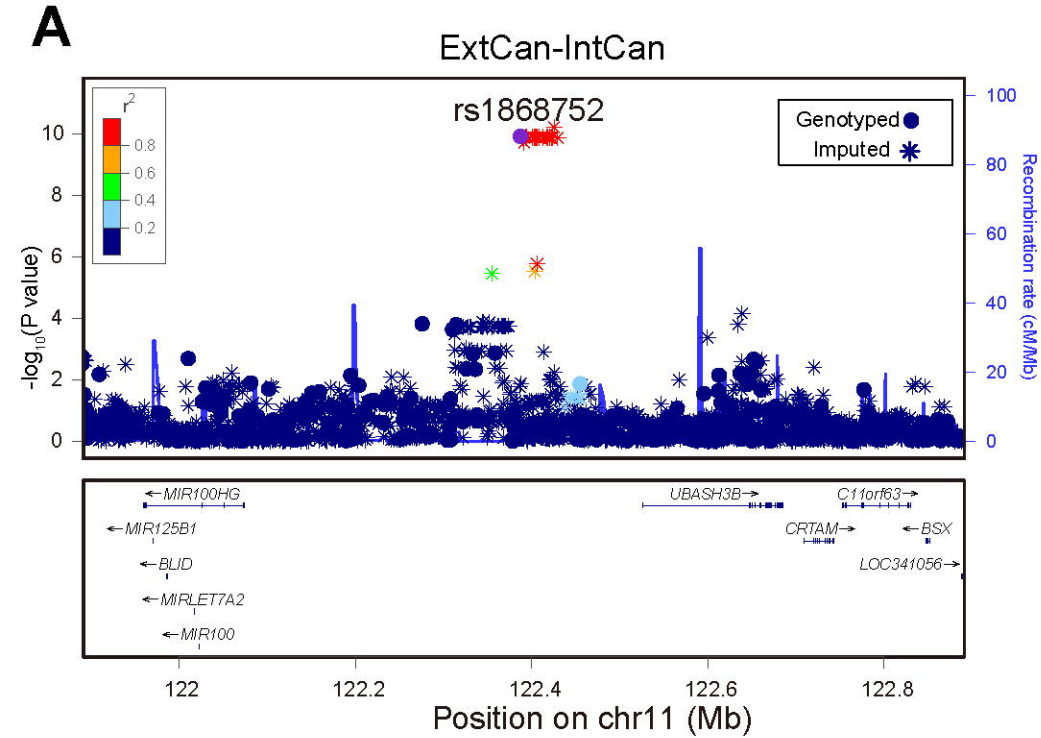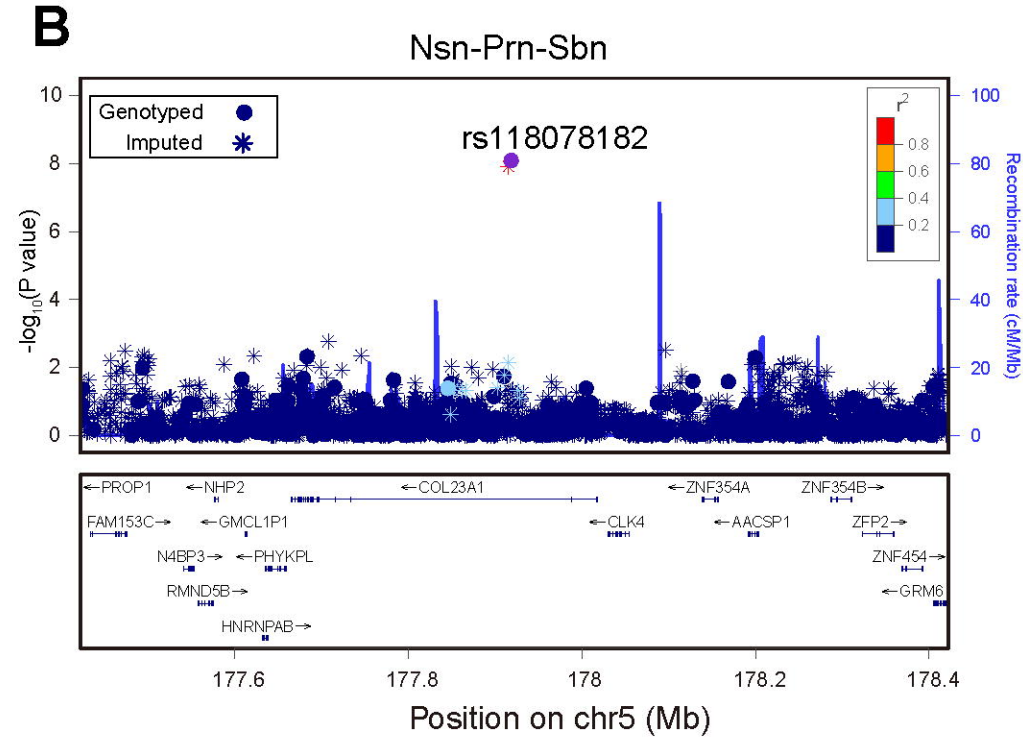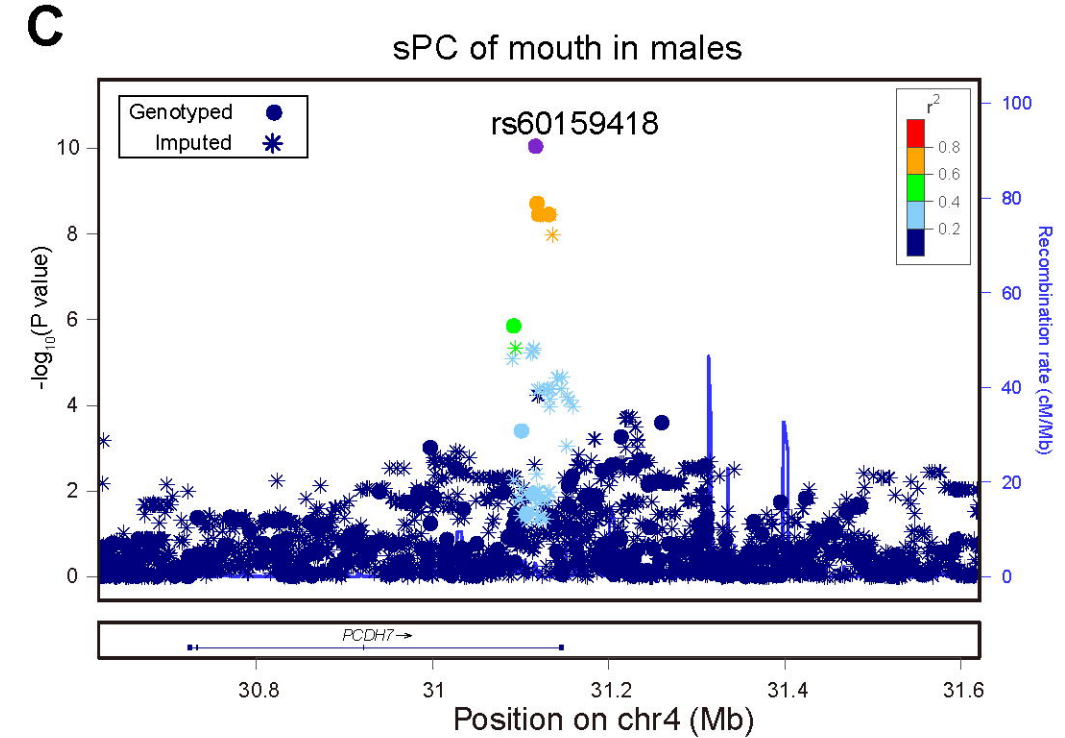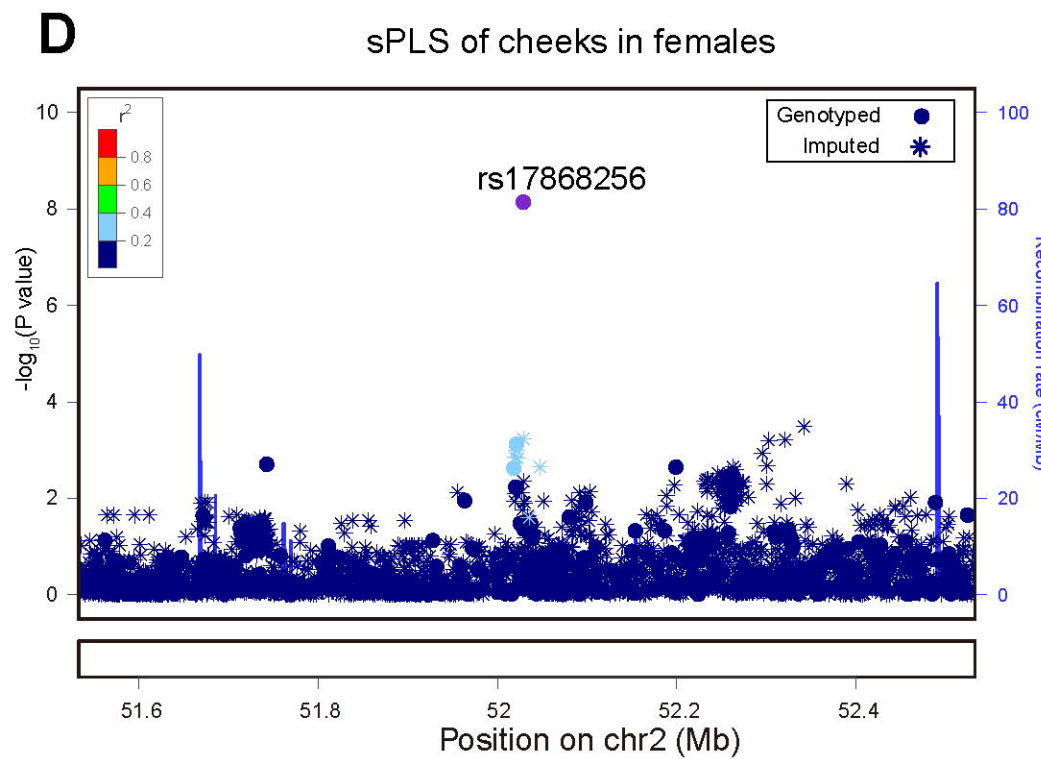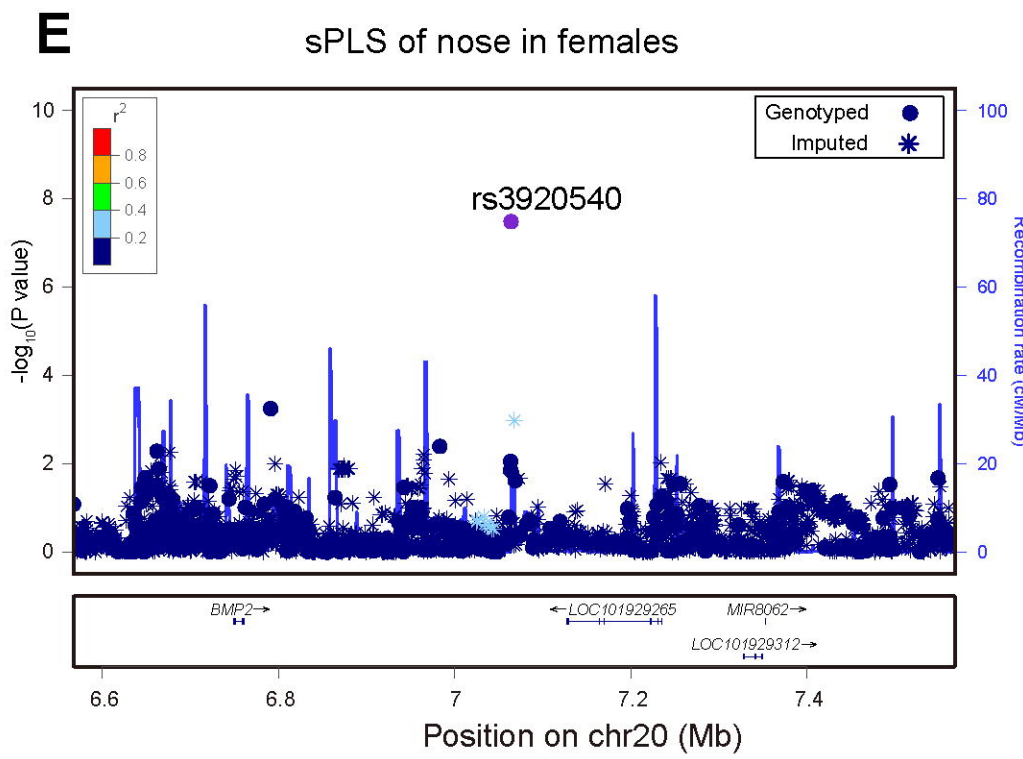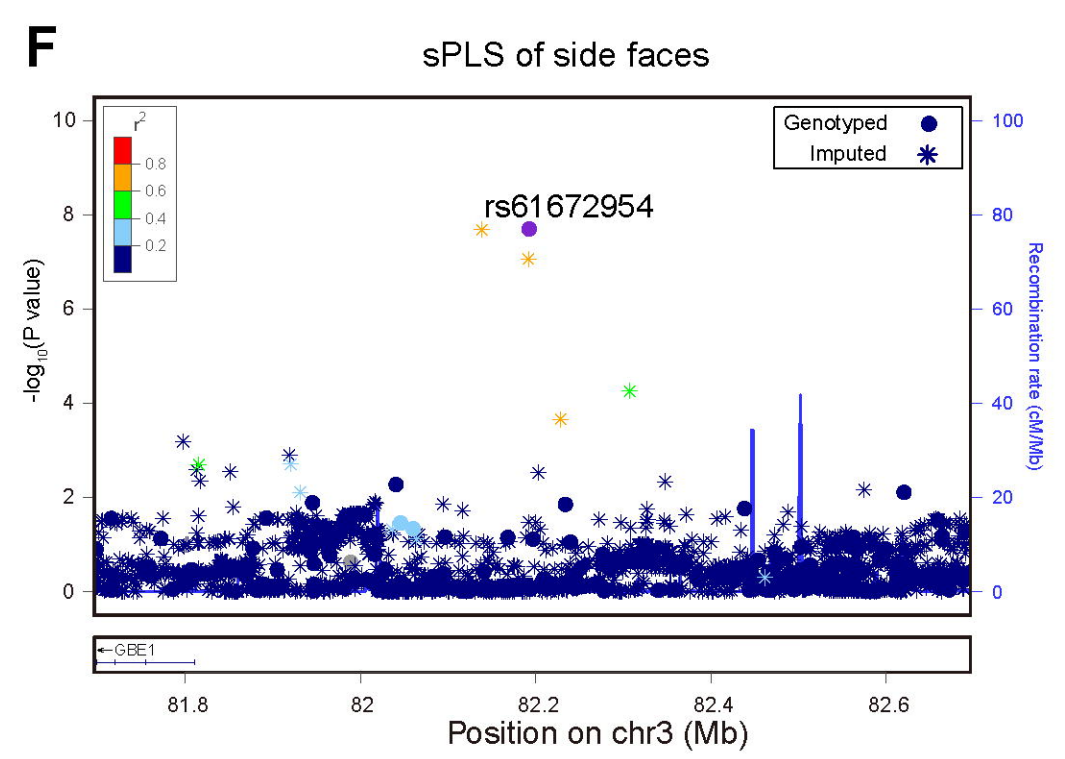

**A**

rs1868752

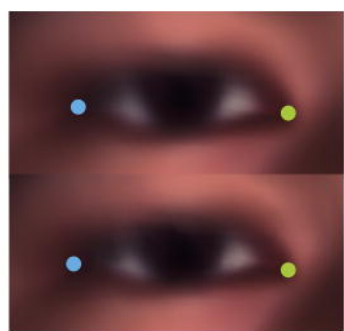

● ExtCan ● IntCan

T

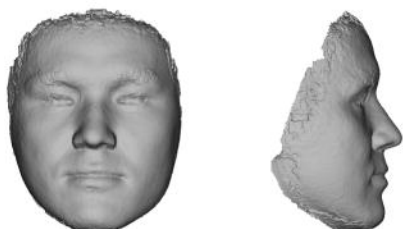

G

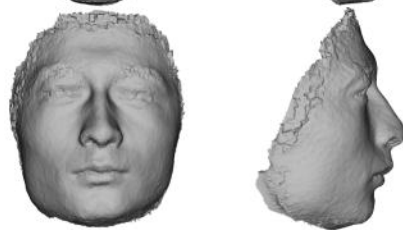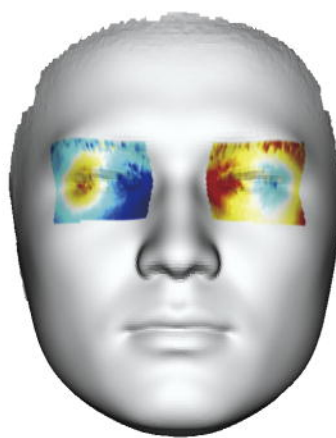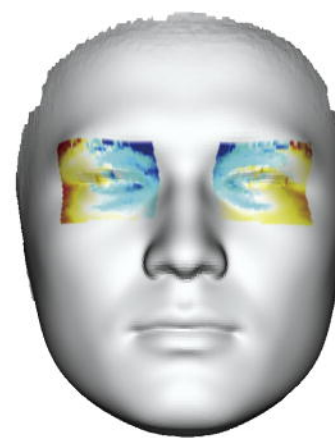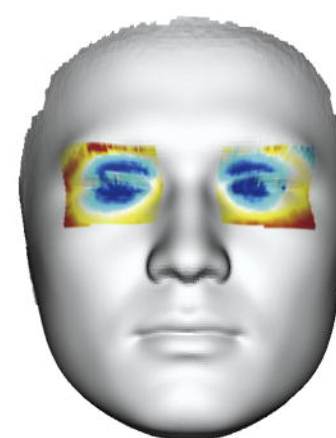

-0.7 0.7

**B**

rs118078182

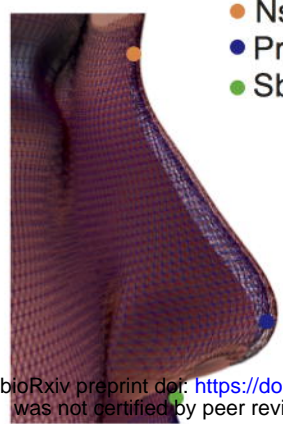

● Nsn  
● Pm  
● Sbn

A

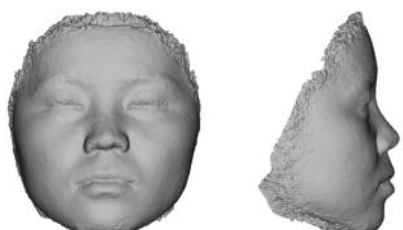

G

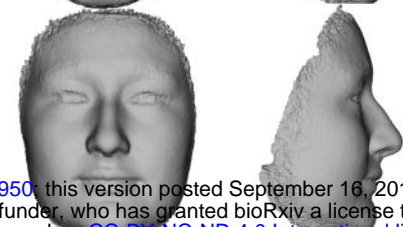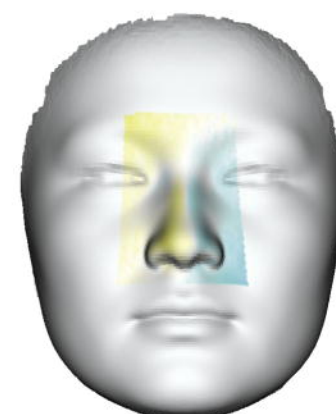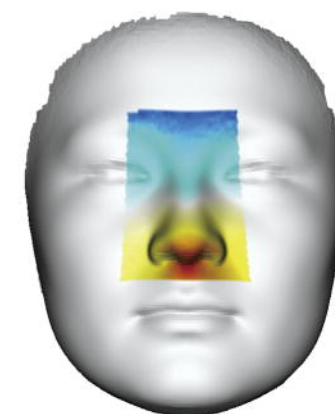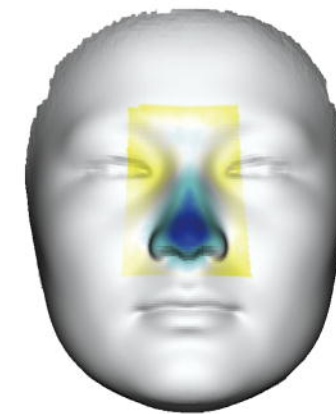

-0.96 0.96

bioRxiv preprint doi: <https://doi.org/10.1101/062950>; this version posted September 16, 2017. The copyright holder for this preprint (which was not certified by peer review) is the author/funder, who has granted bioRxiv a license to display the preprint in perpetuity. It is made available under aCC-BY-NC-ND 4.0 International license.

**C**

rs60159418

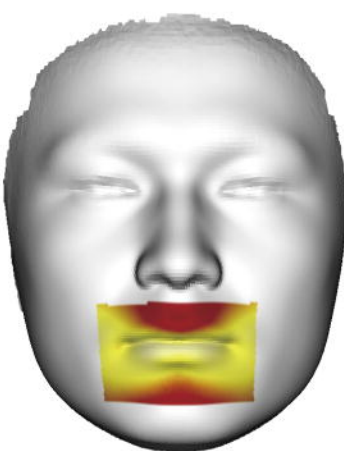

0 max

A

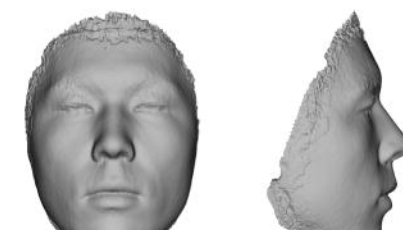

G

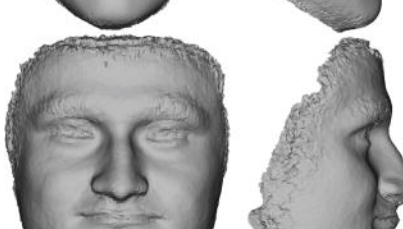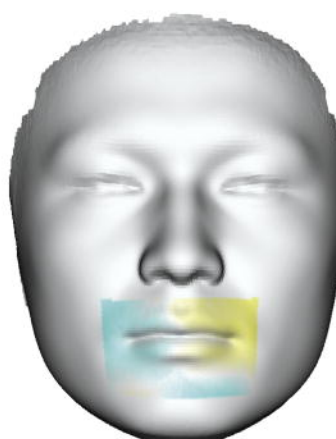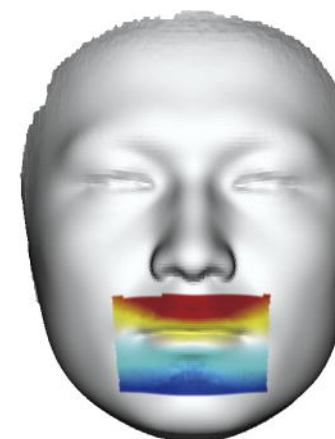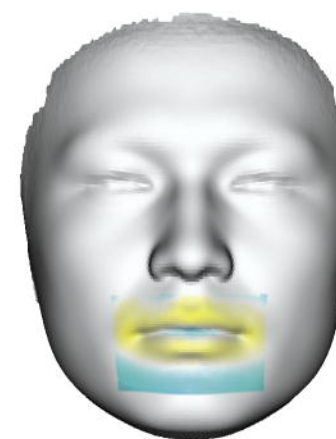

-1.5 1.5

**D**

rs17868256

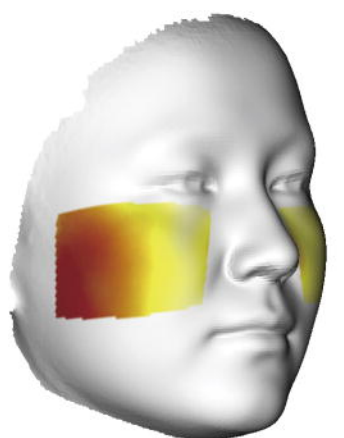

0 max

G

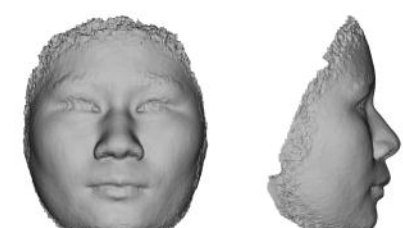

A

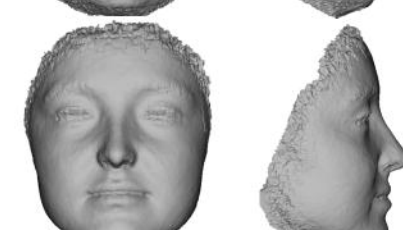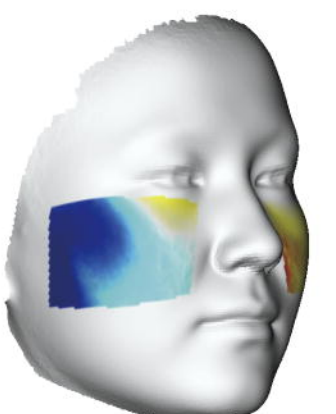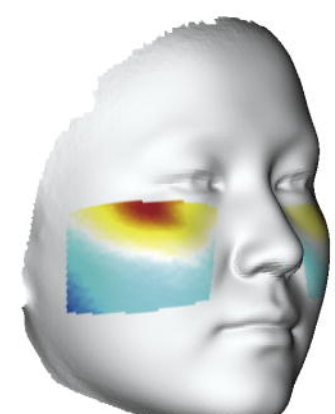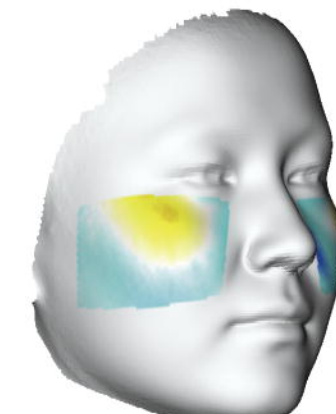

-0.6 0.6

**E**

rs3920540

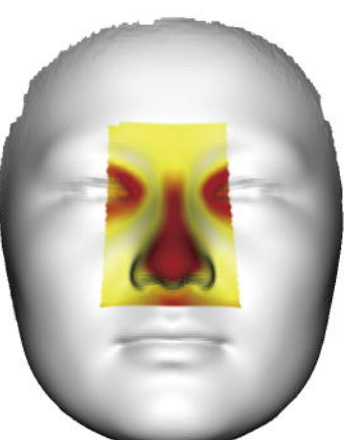

0 max

G

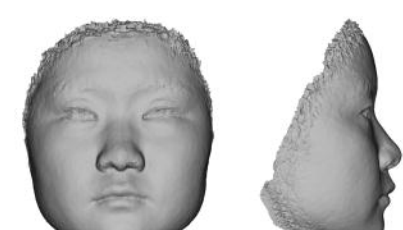

T

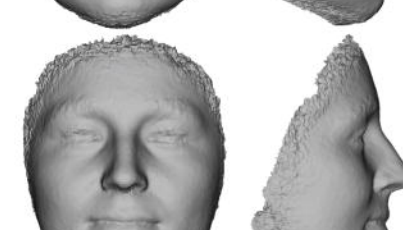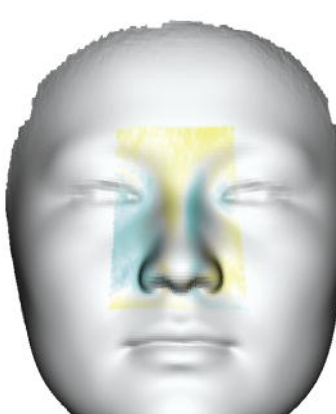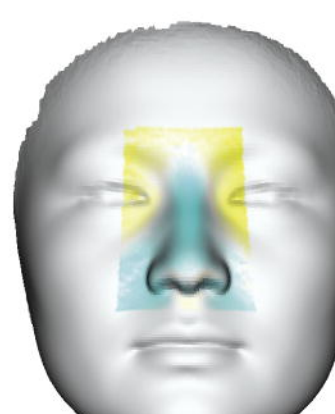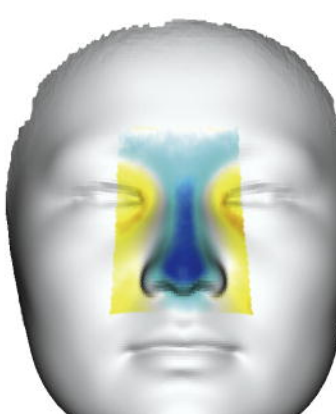

-0.56 0.56

**F**

rs61672954

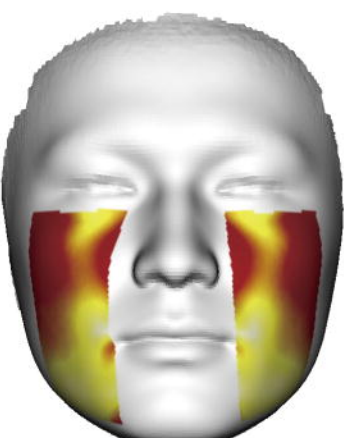

0 max

A

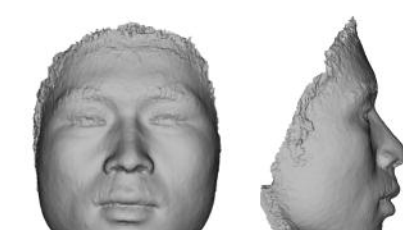

G

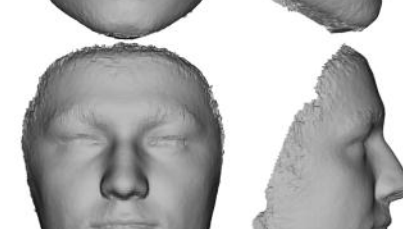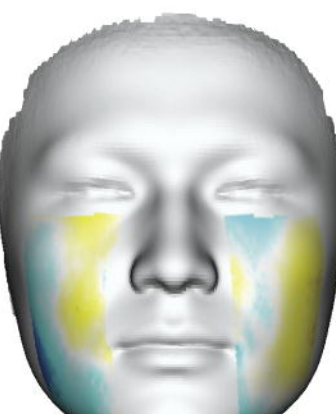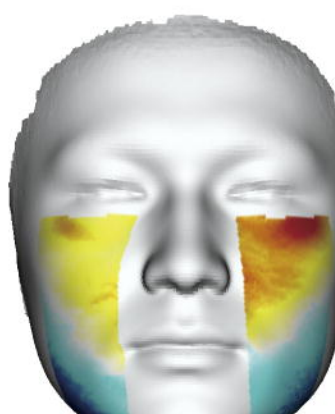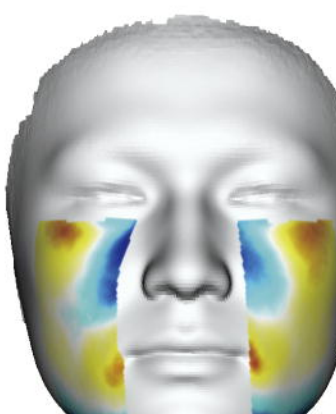

-0.7 0.7

UIG-D

UIG-R

HAN-CZ

**A**

rs1868752

T

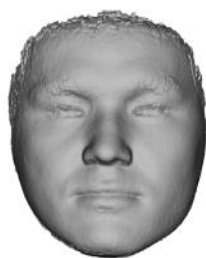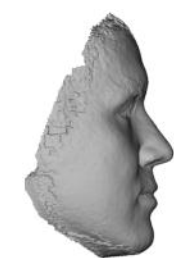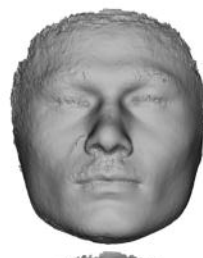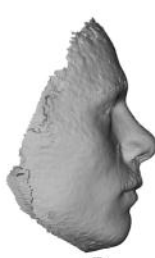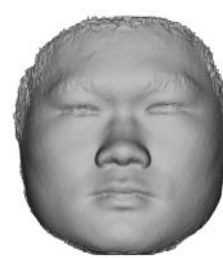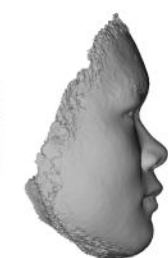

G

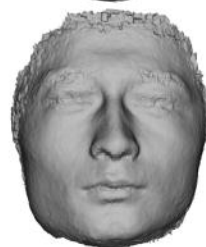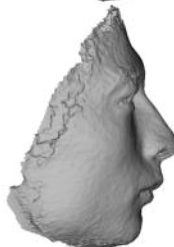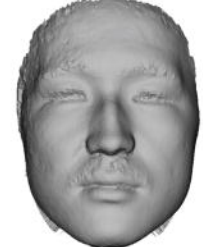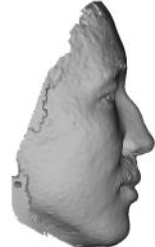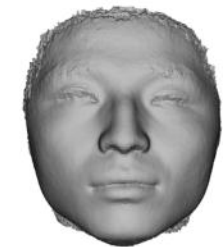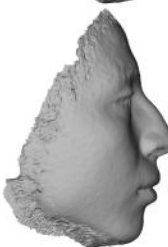

**B**

rs118078182

A

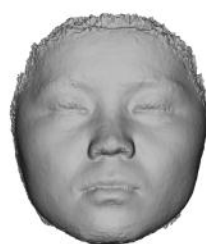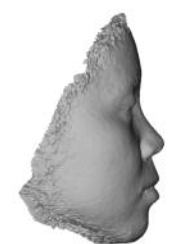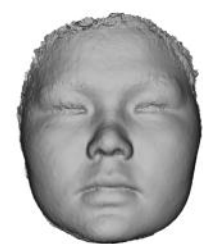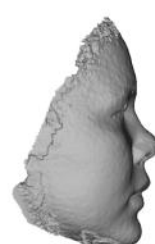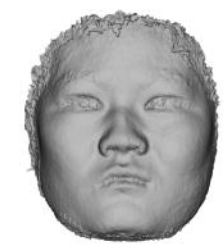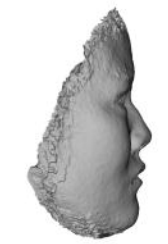

G

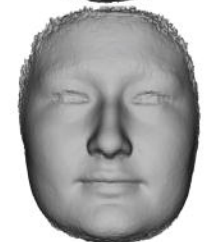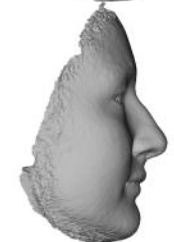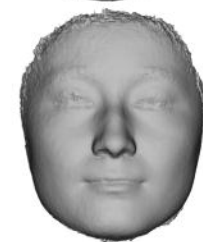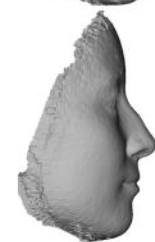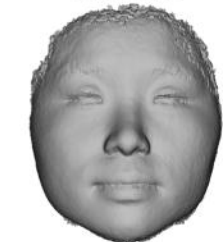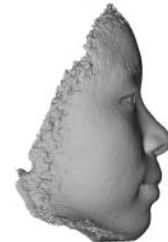

**C**

rs60159418

A

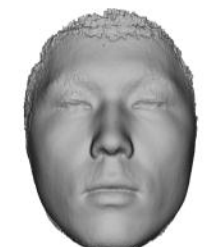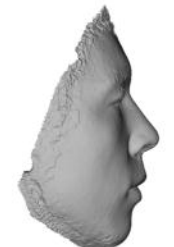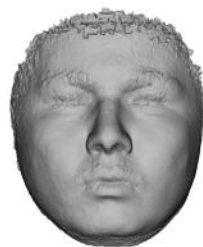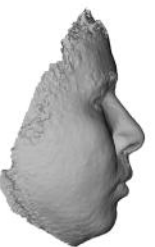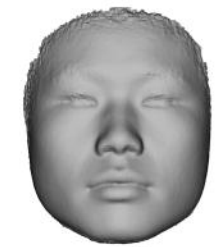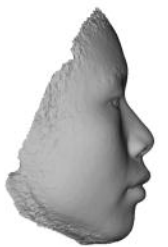

G

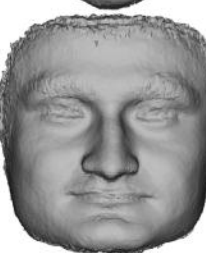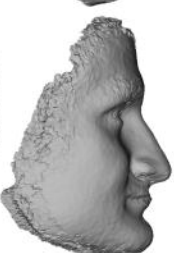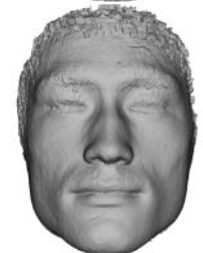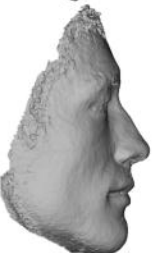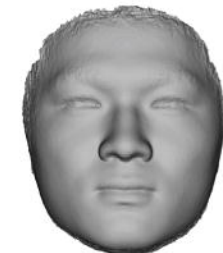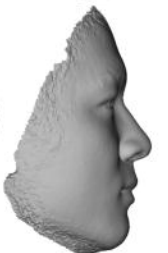

**D**

rs17868256

G

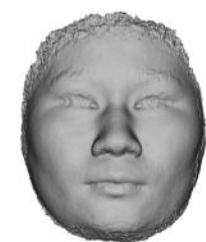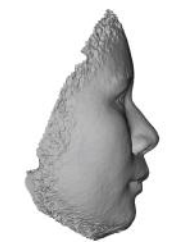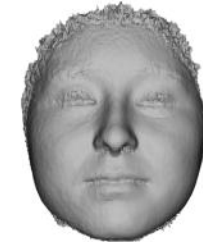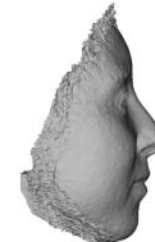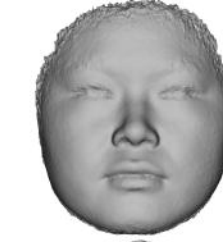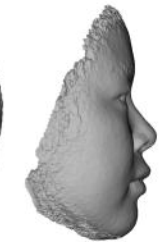

A

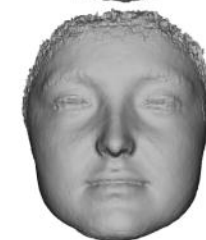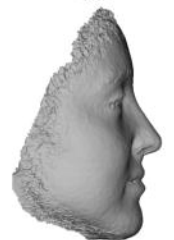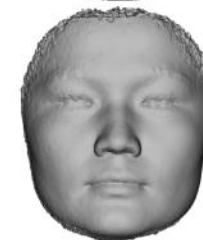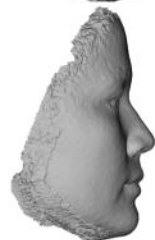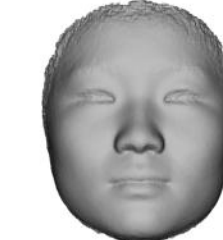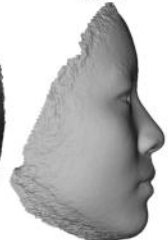



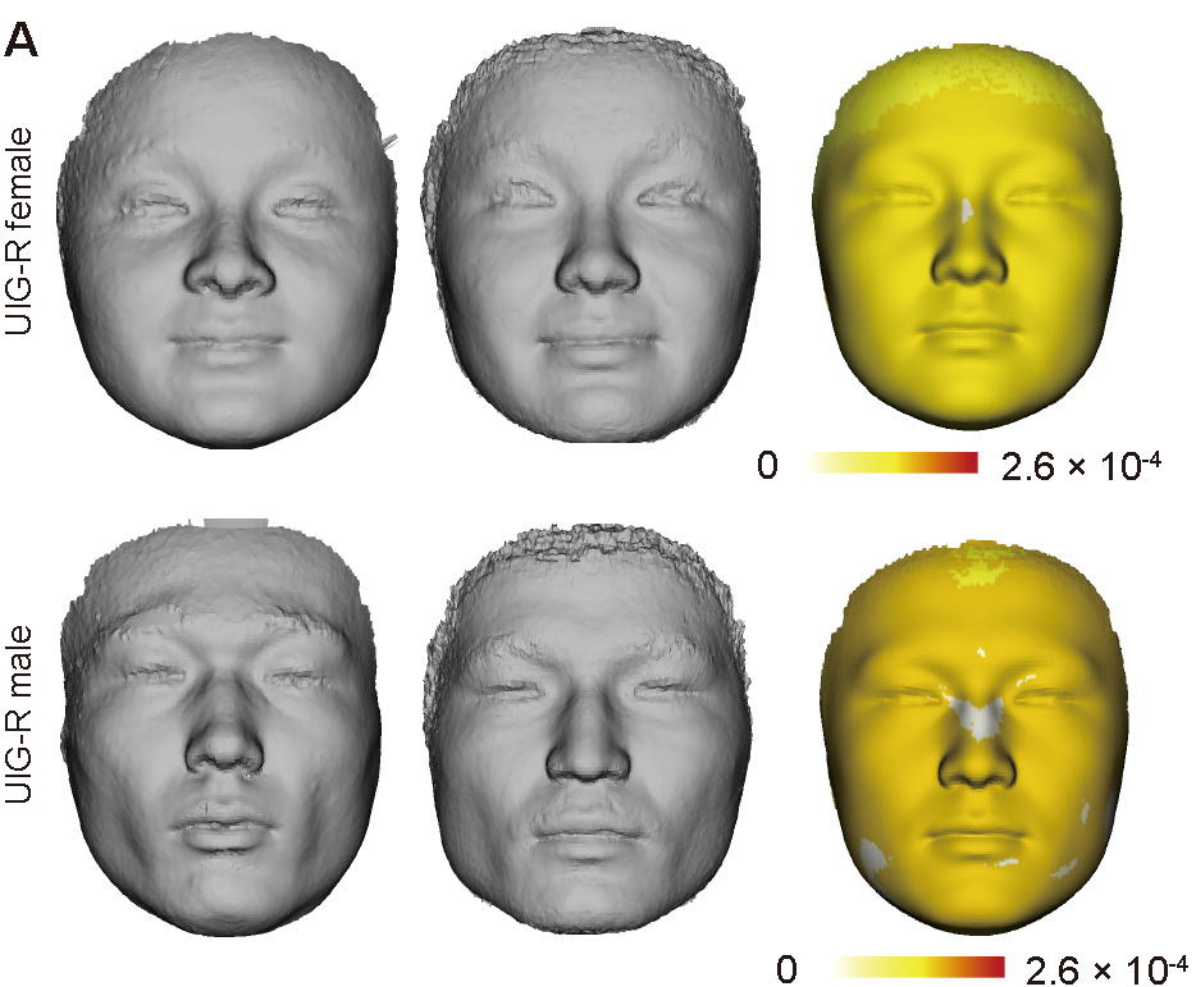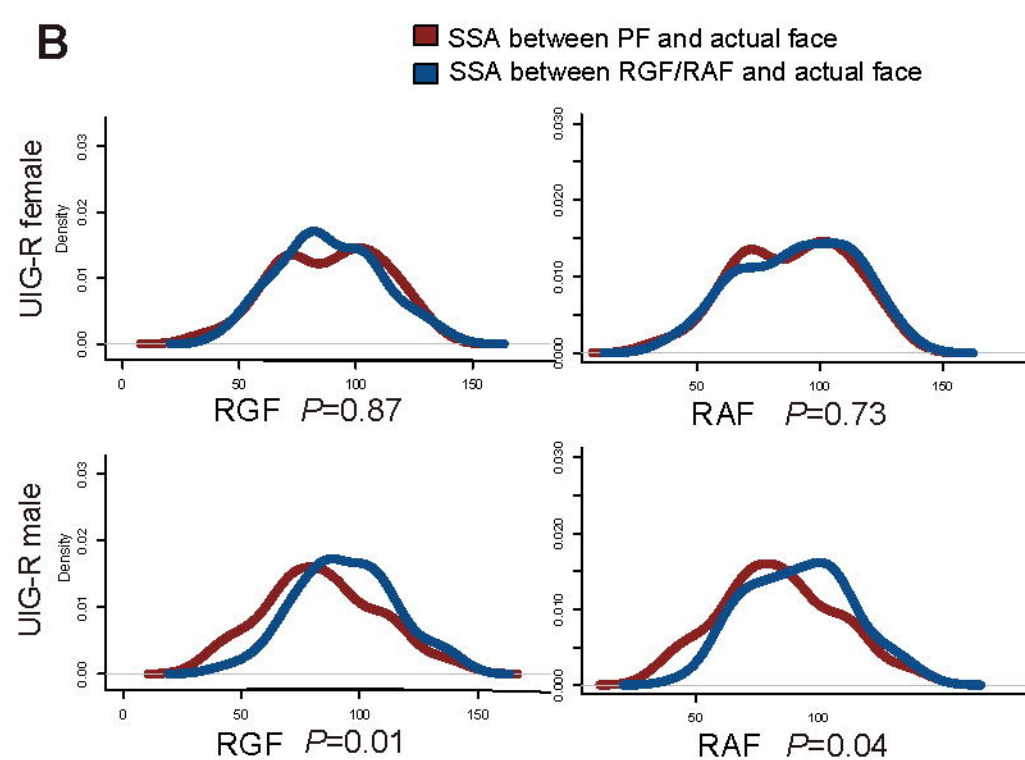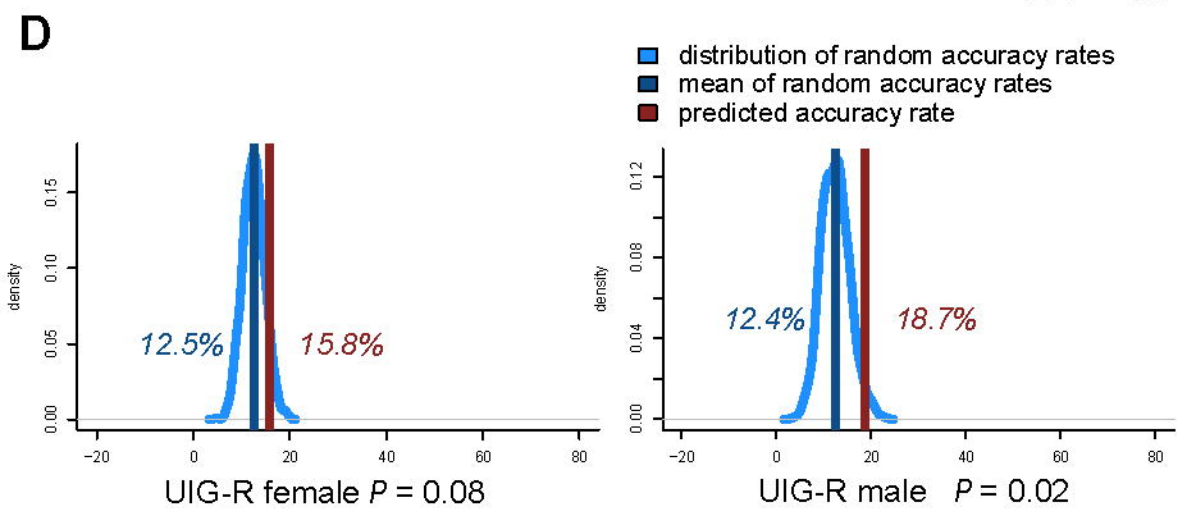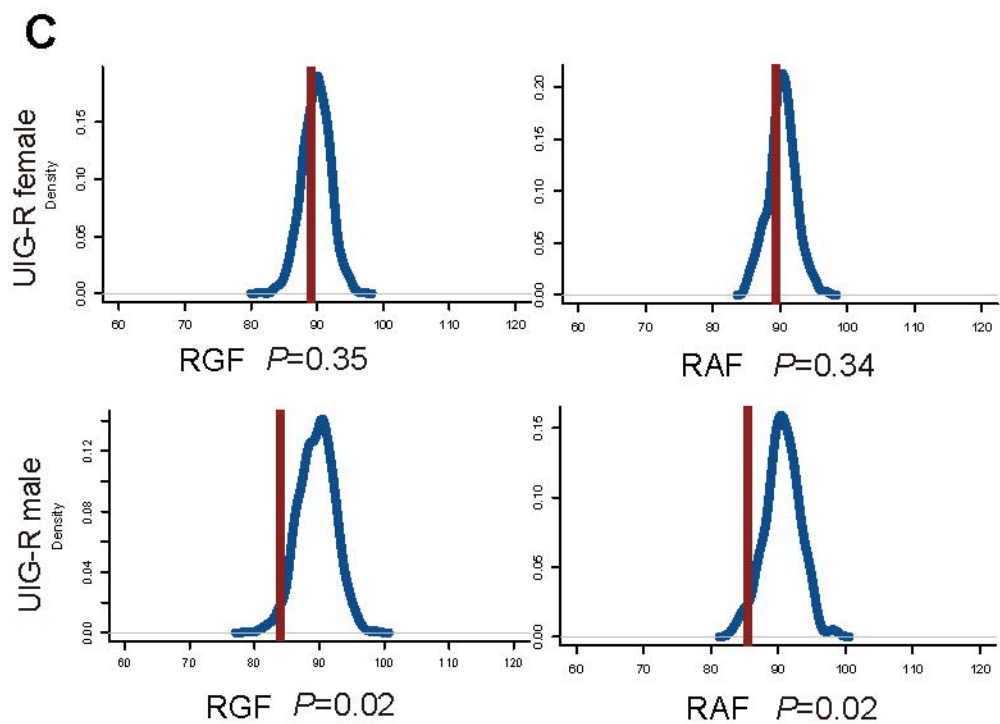

Source: https://www.biorxiv.org/content/10.1101/062950v5.full.pdf
